# Supplementary material
Source: bioRxiv or medRxiv preprint supplement (https://www.biorxiv.org/highwire/filestream/74237/field_highwire_adjunct_files/0/242040-1.pdf)
Supplement: Supplementary file [file 242040-1.pdf]

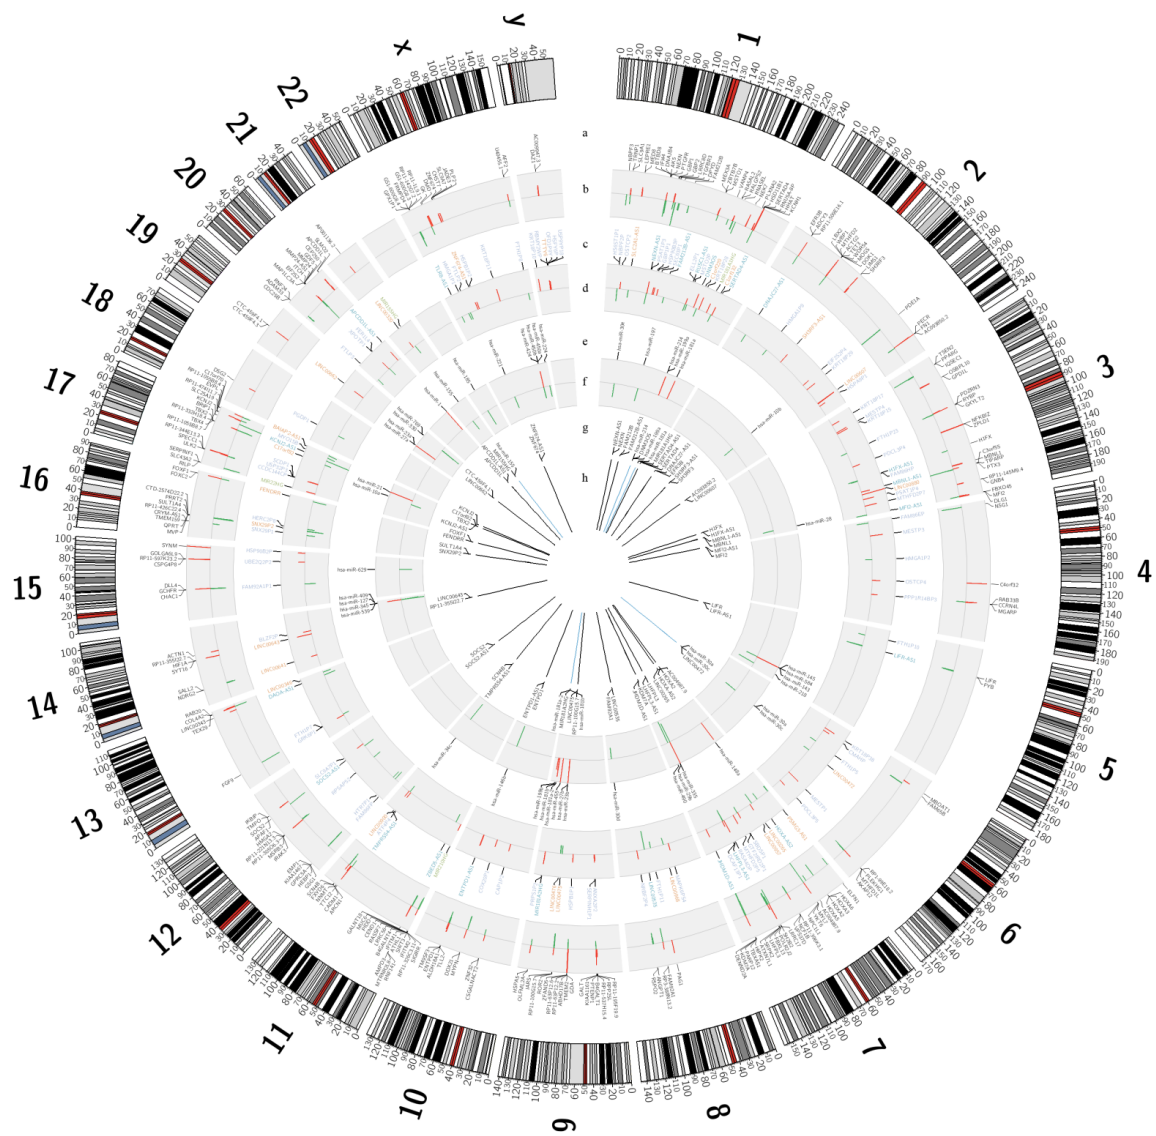

**Fig. S1. The non-coding transcriptome is a key component of the TGF- $\beta$  response of lung fibroblasts.** Circos plot showing the genome-wide transcriptional profiling of TGF- $\beta$ -regulated mRNAs and ncRNAs in lung fibroblasts (Datasets 1 and 2). (b,d,f) Log<sub>2</sub> FoldChange of differentially expressed lincRNAs (d), protein-coding genes near to lincRNA candidate loci (<500kb) (b), and miRNAs (f). Upregulated and downregulated genes are shown in red and green respectively. (a,c,e) Associated protein-coding gene names (a), lincRNA names (c) colored according to their biotype: lincRNAs (orange), pri-miRNAs (green), antisense RNAs (turquoise), pseudogenes (blue), and mature miRNA names (e). (g,h) Inner links representing local lincRNAs-protein-coding genes (black) and lincRNAs-miRNAs (blue) co-regulation associations.

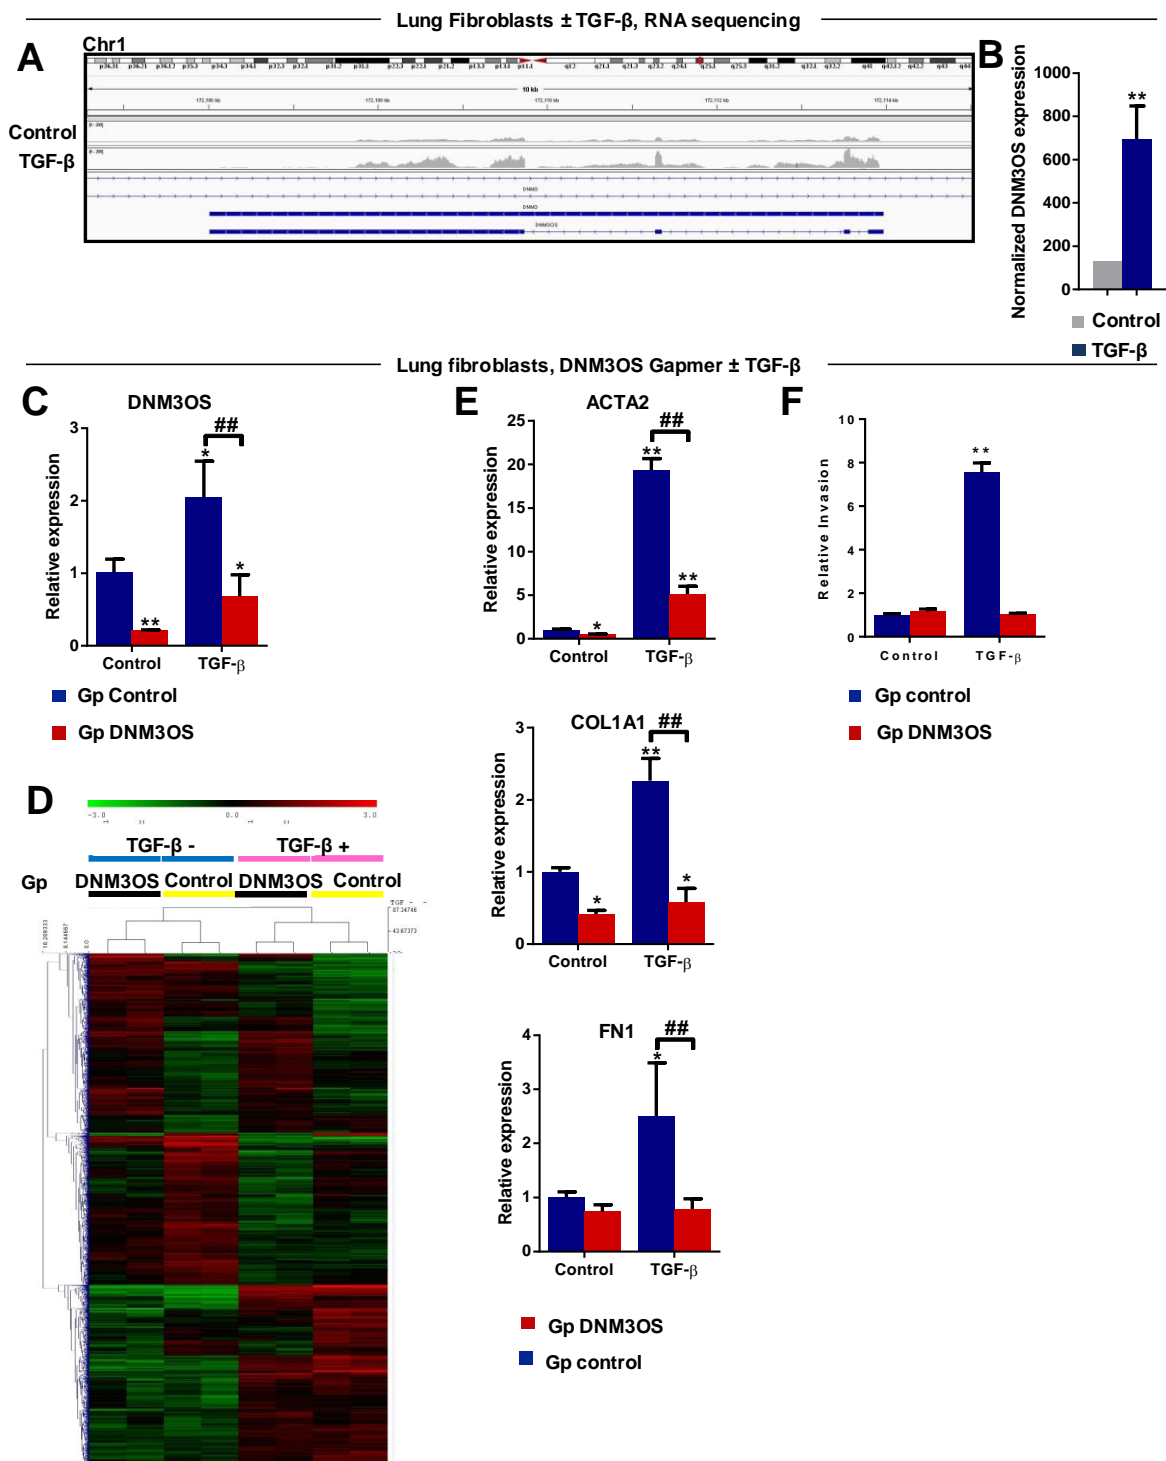

**Fig. S2. Identification of DNM3OS as a key effector of TGF-β signaling.** (A) Screenshot from Integrative Genomic Viewer displaying representative RNA-Seq data of the DNM3OS locus (Dataset 1). An increase of total reads associated with the unprocessed transcript (variant 1, long non-coding RNA, 7,957 bp lncRNA, NR\_038397.2) and the spliced transcript (variant 2, 4,051 bp linear ncRNA, lncRNA, NR\_103486.1) following TGF-β treatment is shown. (B) Bar charts showing the normalized expression of DNM3OS in control or TGF-β stimulated cells. Data from high-throughput sequencing are expressed as normalized counts ± SEM for three independent experiments. \*\* P<0.01. (C-E) Functional impact of DNM3OS silencing on TGF-β signaling in pulmonary fibroblasts. MRC5 cells were transfected with either a control or a DNM3OS-specific gapmer (Gp) and then incubated with or without TGF-β (C) Bar charts showing the relative expression of DNM3OS in the indicated conditions. Data are expressed as mean ± SEM. (n=3) \* P<0.05 \*\* P<0.01 ## P<0.01. (D) Heatmap comparing the normalized log2 expression of significantly modulated transcripts obtained by microarray analysis (n=2 per group, Dataset 3). (E) Bar charts showing the relative expression of ACTA2 (α-SMA) COL1A1 and FN1 compared to PPIA in the indicated conditions. Data are expressed as mean ± SEM. (n=3) \* P<0.05 \*\* P<0.01 ## P<0.01. (F) Bar charts showing the relative quantification of invasion in the indicated conditions. Data are expressed as mean ± SEM (n=3). \*\* P<0.01.

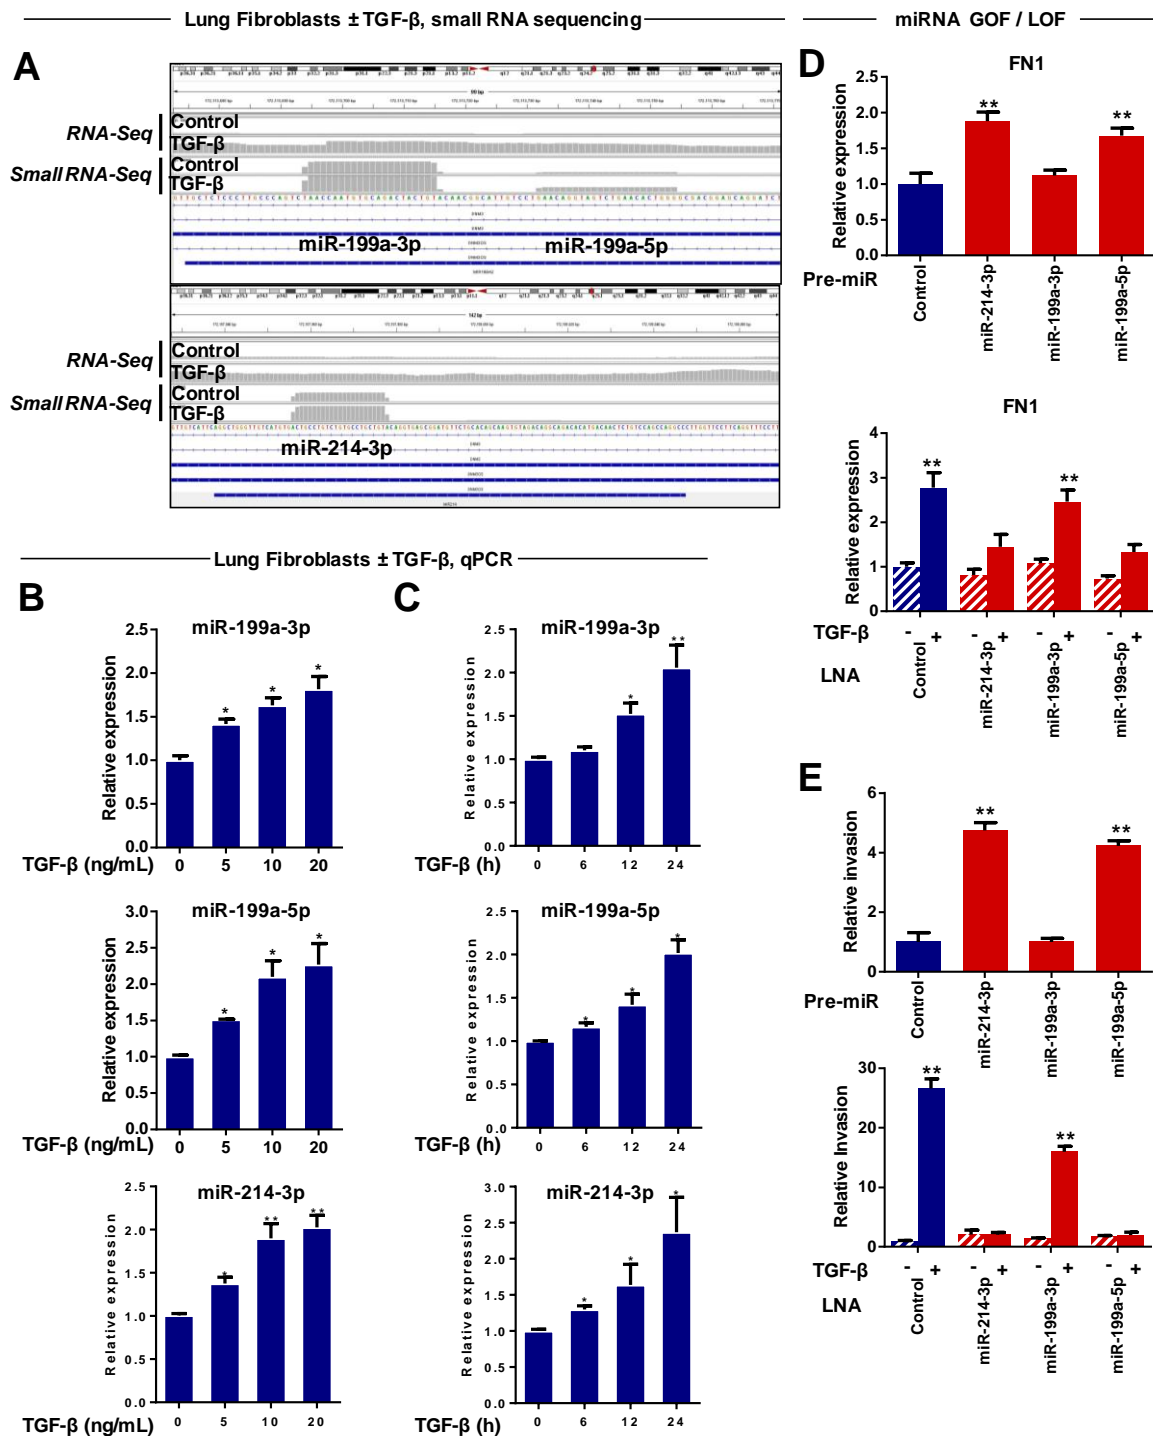

**Fig. S3. DNMT3OS is processed into three profibrotic miRNAs in lung fibroblasts.** (A) Screenshot from IGV browser displaying representative small RNA-Seq data of the DNMT3OS locus in TGF-β-exposed human pulmonary fibroblasts or control conditions (Dataset 2). Zoomed in view of the regions corresponding to miR-199a2 and miR-214, which shows, in response to TGF-β, an increase number of reads associated with the following mature miRNAs: miR-199a-3, miR-199a-5p and miR-214-3p. As the expression of miR-214-5p represents only 5% of the total reads of miR-214, this miRNA was not considered relevant. (B,C) Bar charts showing dose- (B) and time-dependent (C) expression of DNMT3OS-associated miRNAs in MRC5 cells exposed or not to TGF-β. RNU44 was used as reference. Data are expressed as mean ± SEM (n=3). \* P<0.05 \*\* P<0.01. (D) Bar charts showing the relative expression of FN1 compared to PPIA in the indicated condition. Data are expressed as mean ± SEM. (n=3) \*\* P<0.01. (E) Bar charts showing the relative quantification of invasion in the indicated conditions. Data are expressed as mean ± SEM (n=3). \*\* P<0.01.

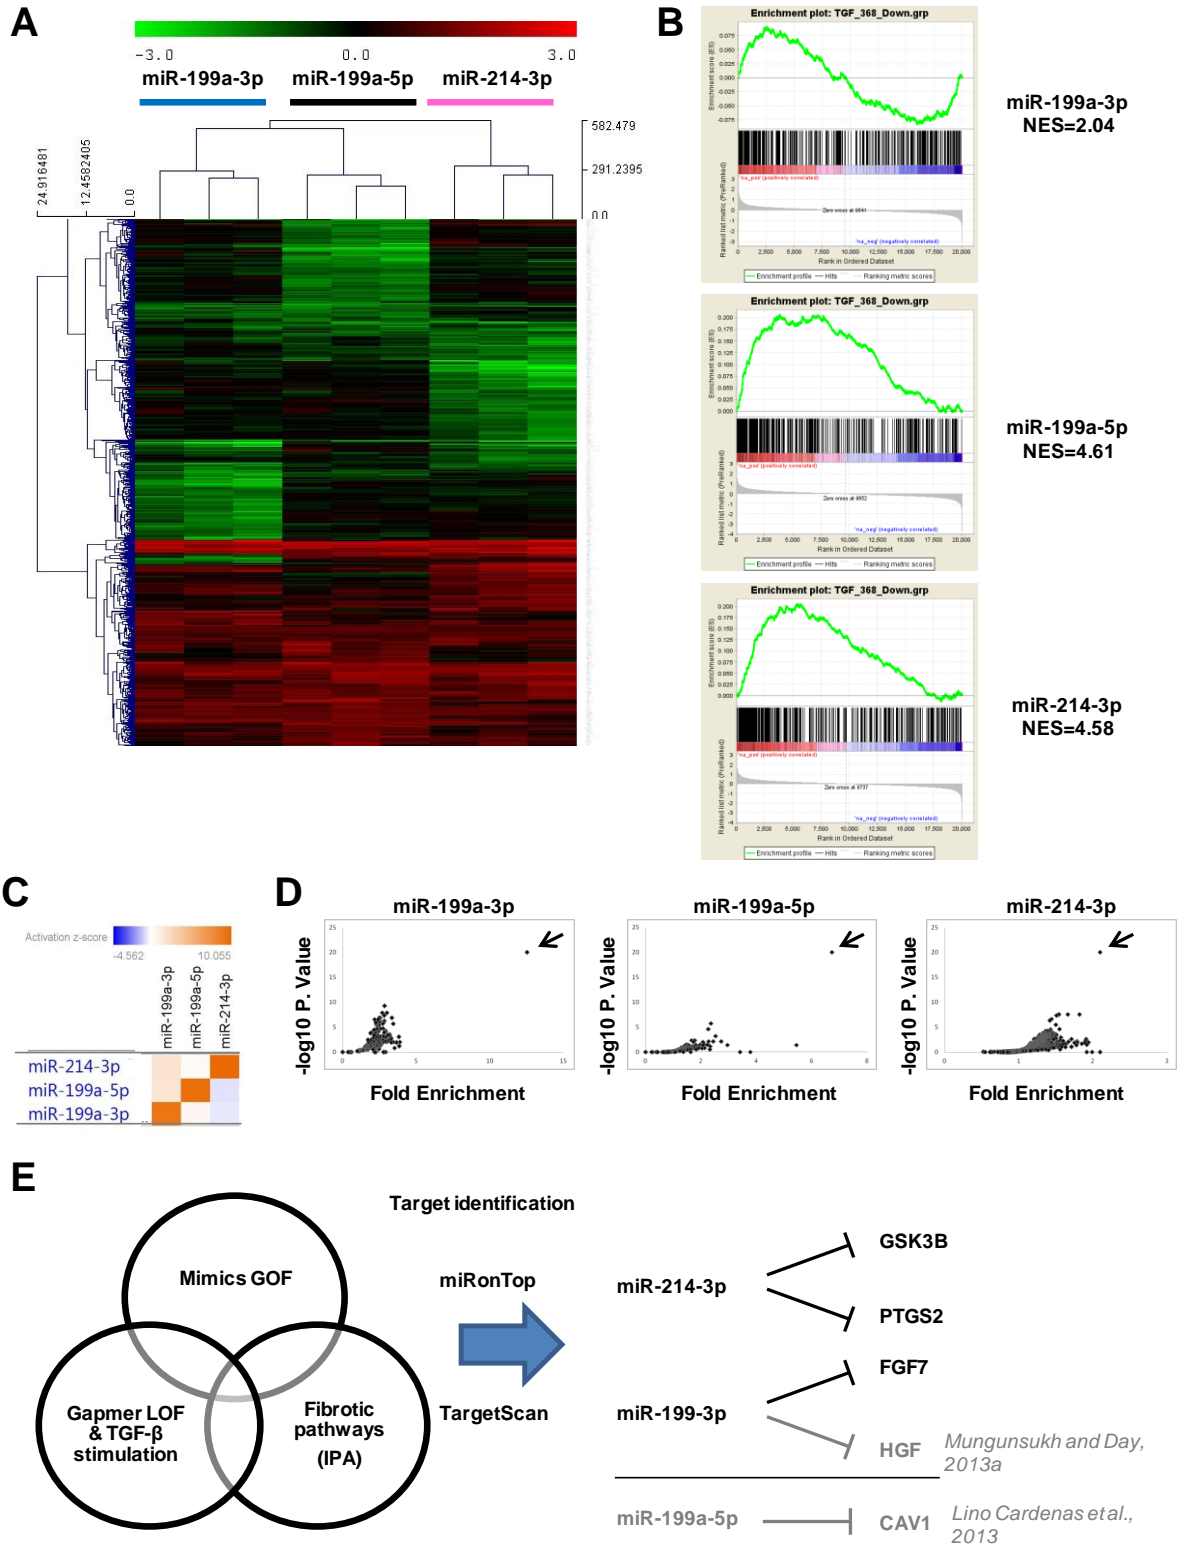

**Fig. S4. Identification of the cellular pathways and gene targets associated with the miR-199a~214 cluster in human lung fibroblasts. (A)** Heatmap showing the genes differentially expressed after individual miRNA mimics overexpression in lung fibroblasts (dataset 4). **(B)** GSEA plots of an experimental TGF- $\beta$ -signature (Dataset 5) showing a significant enrichment of miR-199a-5p and miR-214-3p down-regulated transcripts. Genes whose expression is downregulated after miRNA mimics overexpression were compared to an experimental TGF- $\beta$  signature obtained in the same cells (MRC5 cells). TGF- $\beta$  signature consists of 368 transcripts downregulated in response to TGF- $\beta$  ( $\log_2$  ratio  $< -1$ , adj.p value  $< 0.01$ ). In each case, graphs show the enrichment plot, the score at the peak corresponding to the ES and the position of the TGF- $\beta$  gene set in the ranked list of genes (each transcript is indicated by a vertical bar). **(C,D)** Overrepresentation of miRNA predicted targets in the set of downregulated transcripts following miR-199a-5p/3p and miR-214-3p transfection using **(C)** Ingenuity Pathway Analysis and **(D)** the webtool miRonTop. Each arrow indicates the corresponding overexpressed miRNA **(E)** Global strategy combining genomics data and bioinformatics tools to identify miR-199a-3p and miR-214-3p target genes (GOF: gain of function, LOF: loss of function).

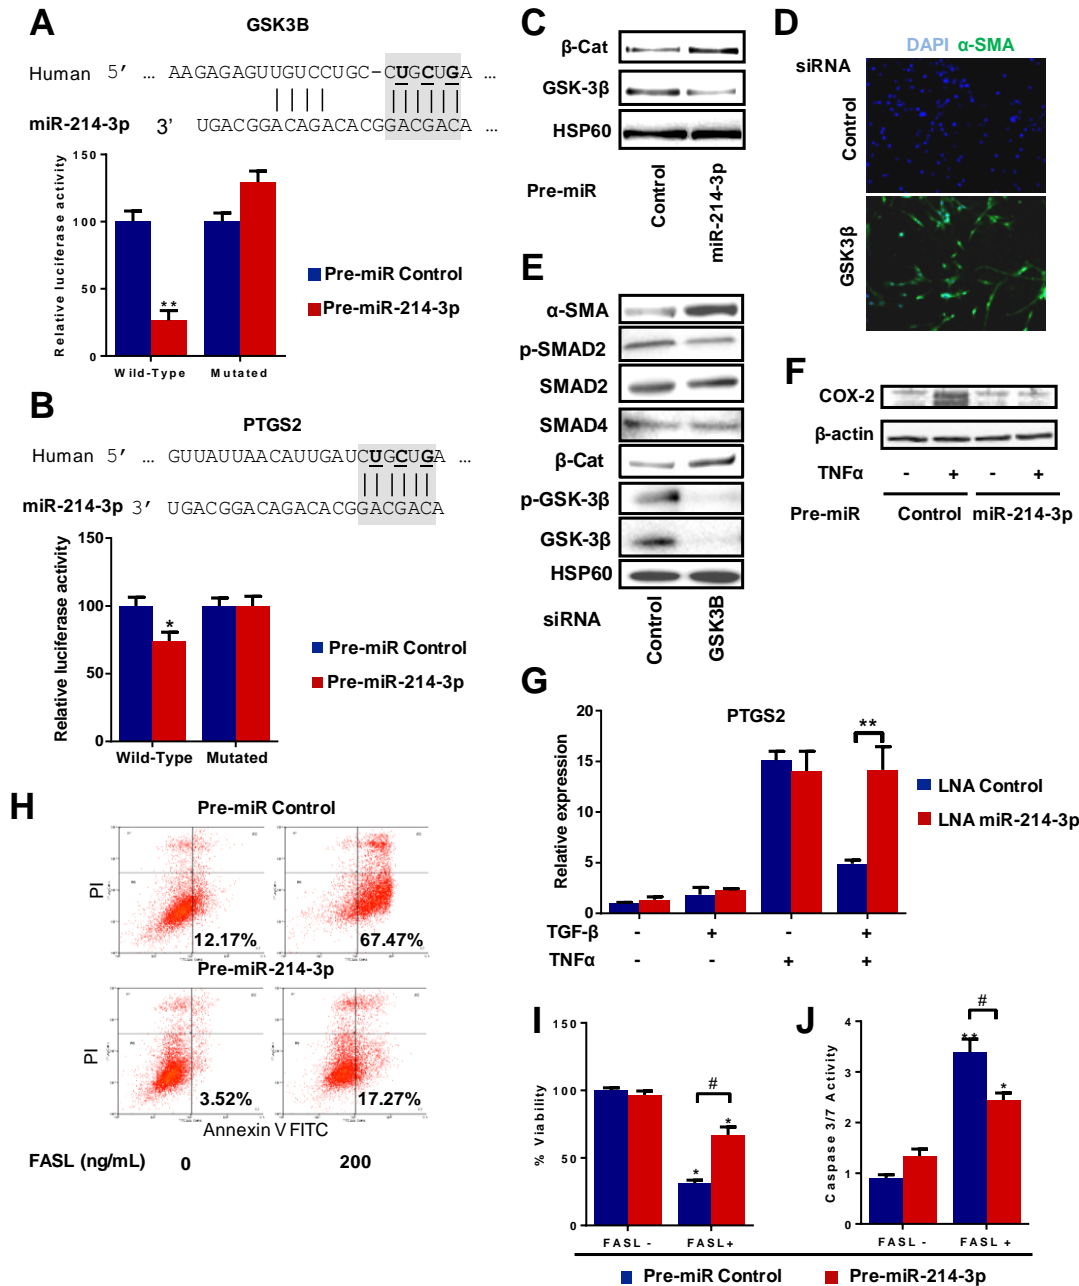

**Fig. S5. miR-214-3p mediates TGF- $\beta$ -induced lung fibroblast activation by targeting two distinct targets: GSK-3 $\beta$  and COX-2.** (A,B) GSK3B and PTGS2 are direct targets of miR-214-3p. Position of miR-214-3p functional target site in hGSK3B and hPTGS2 3' UTR and validation of the functional interaction between miR-214-3p and its targets using luciferase reporter assay. The "seed" region of the miRNA is highlighted in grey. Bases that have been mutated in the psiCHECK-2 construct are underlined. Pre-miR-214-3p or control and hGSK3B or hPTGS2 3'UTR-derived psiCHECK-2 constructs were transfected in HEK293 cells. All renilla luciferase activities were normalized with firefly luciferase activity. (n=3) \*\* P<0.01. (C) Western Blot showing the impact of miR-214-3p overexpression in lung fibroblasts on  $\beta$ -catenin and GSK-3 $\beta$  protein expression. HSP60 was used as a loading control. One representative experiment out of two is shown. (D,E) Effects of siRNA-mediated depletion of GSK-3 $\beta$  in lung fibroblasts on myofibroblast differentiation, SMAD signaling and GSK-3 $\beta$ / $\beta$ -catenin axis. MRC5 cells were transfected with validated siRNA against GSK-3 $\beta$  or control. (D) Immunofluorescence analysis using antibodies against  $\alpha$ -SMA (green) and DAPI (blue). Representative images out of 2 experiments are shown at  $\times 10$  magnification (E) Western Blot showing  $\alpha$ -SMA expression, SMAD signaling (p-SMAD2 and SMAD2 and SMAD4) and the GSK-3 $\beta$ / $\beta$ -catenin axis (p-GSK-3 $\beta$ , GSK-3 $\beta$  and  $\beta$ -catenin). HSP60 was used as a loading control. One representative experiment out of two is shown. (F,G) Gain and loss of function experiments showing that miR-214-3p suppresses COX-2 expression. (F) Western blot showing COX-2 level.  $\beta$ -actin was used as a loading control. One representative experiment out of two is shown. (G) Bar chart showing PTGS2 relative expression compare to PPIA in the indicated conditions. Data are expressed as mean  $\pm$  SEM. (n=3) \*\* P<0.01. (H-J) miR-214-3p overexpression protects lung fibroblasts from FASL-induced cell death. Cell viability was quantified using (H) annexin V / Propidium iodide by flow cytometry (one representative experiment out of 3 is shown), (I) ATP-based assay (n=3, \* P<0.05, # P<0.01) and (J) caspase 3/7 activity (n=3, \* P<0.05, # P<0.01).

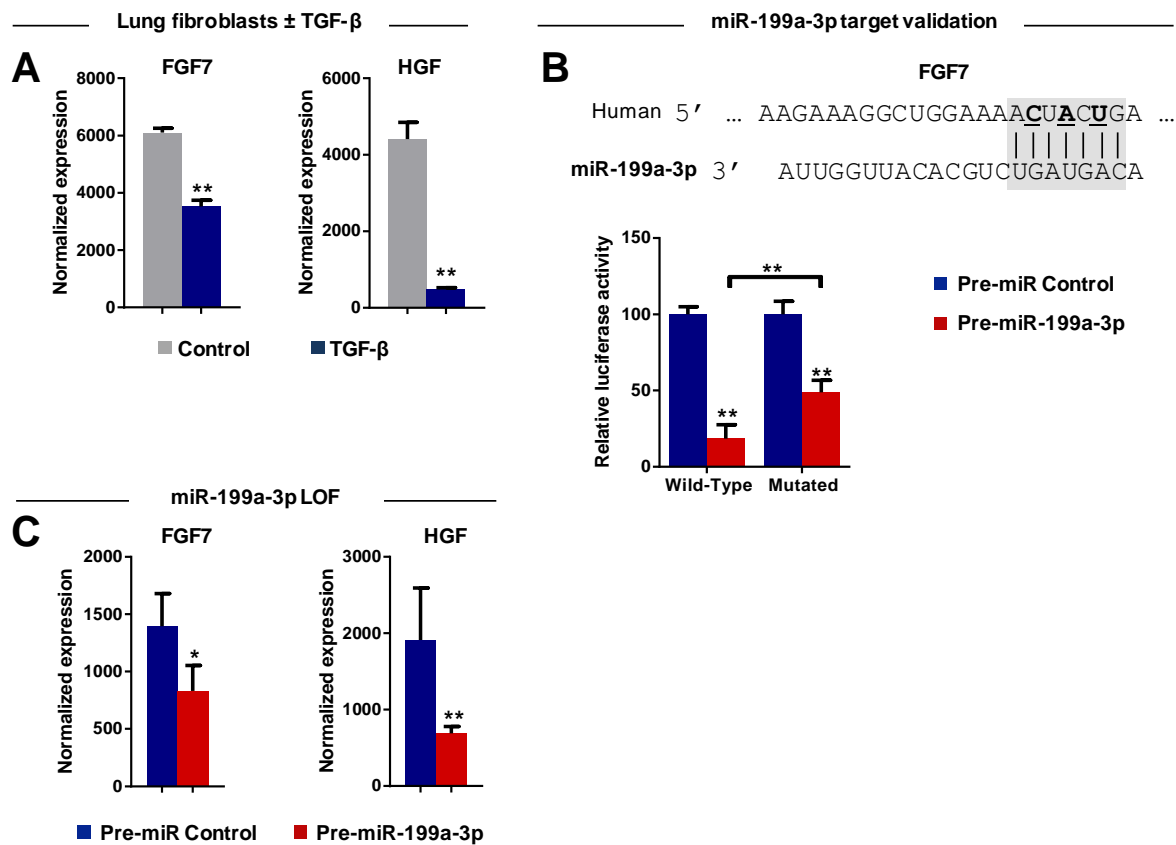

**Fig. S6. KGF/FGF7 and HGF are direct targets of miR-199a-3p.** (A) HGF and KGF/FGF7 transcripts are down-regulated by TGF-β in lung fibroblasts. Normalized expression from transcriptomic studies are shown. (B) Position of miR-199a-3p functional target site in hFGF7 3' UTR and validation of the functional interaction between miR-199a-3p and FGF7 using luciferase reporter assay. The “seed” region of the miRNA is highlighted in grey. Bases that have been mutated in the psiCHECK-2 construct are underlined. Pre-miR-199a-3p or control and hFGF7 3'UTR-derived psiCHECK-2 constructs were transfected in HEK293 cells. All renilla luciferase activities were normalized with firefly luciferase activity. (n=3) \*\* P<0.01. (C) Bar charts showing the normalized expression values of KGF and HGF in MRC5 lung fibroblasts after transfection with pre-miR-199a-3p using microarray data. Data are expressed as mean ± SEM (n=2). \* P<0.05 \*\* P<0.01.



LNA-miR-199a-5p intratracheal administration

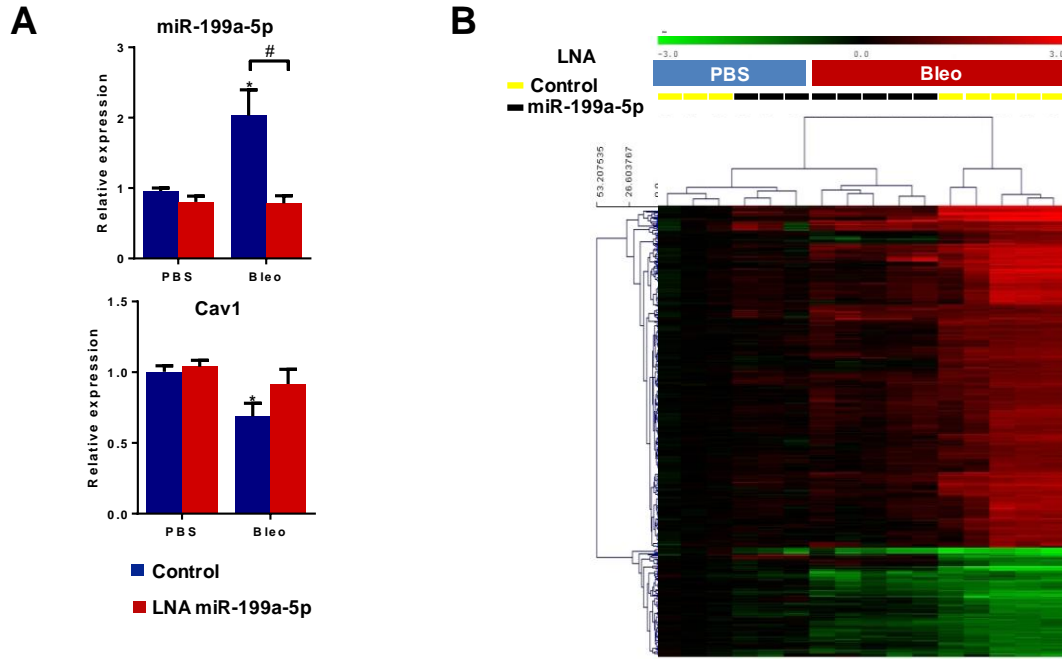

Cav1 TSB intratracheal administration

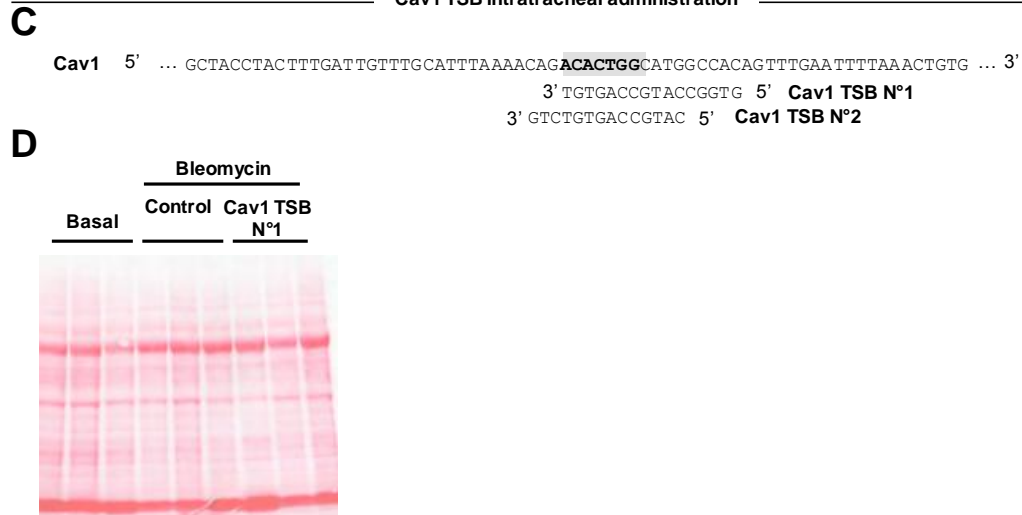

**Fig. S7. Interfering with miR-199a-5p function prevents lung fibrosis in vivo.** (A) Bar charts showing the relative pulmonary expression of miR-199a-5p (compared to SNO251) as well as Cav1 (compared to PPIA) in the LNA-miR-199a-5p protocol. Data are expressed as mean  $\pm$  SEM.  $n=4-6$  mice in each group. \*  $P<0.05$ , #  $P<0.05$ . (B) Heatmap representing the differential transcriptomic response to bleomycin in the lungs of mice treated with LNA-miR-199a-5p or LNA-control ( $n=3-5$  mice in each group, Dataset 6). (C) Position and alignment of the two Cav1 TSB used in vivo with Cav1 3'UTR. (D) Ponceau staining of the membrane used in Fig. 4e showing equal loading of the samples.

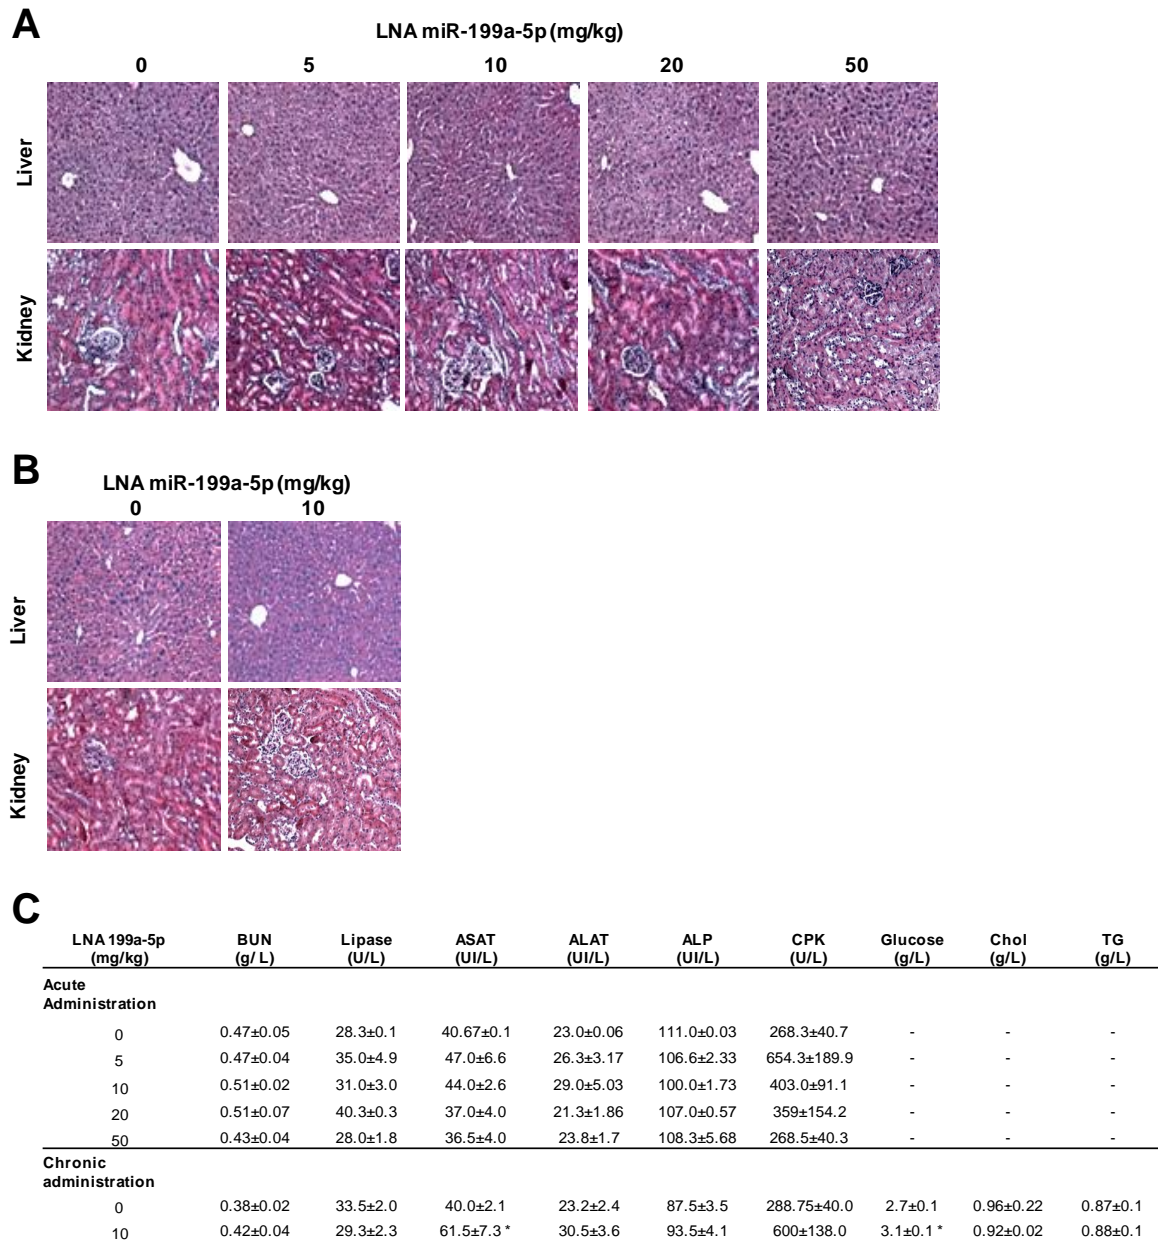

**Fig. S8. Acute and chronic systemic administration of LNA-199a-5p inhibitor does not induce major side effects.** (A) Acute toxicity study. LNA-miR-199a-5p antisense probe was administered intraperitoneally in mice (n=3 per group) at dose rate of 0, 5, 10, 20 and 50 mg/kg body weight. 4 days after injection, kidneys and livers were collected and processed for histological analysis. One representative H&E section is shown for each condition at x 10 magnification. (B) Chronic toxicity study. LNA-miR-199a-5p antisense probe was repeatedly administered intraperitoneally in mice (n=3 mice per group) at dose rate of 10 mg/kg body weight once a week for 4 weeks. Kidneys and livers were collected and processed for histological analysis. One representative H&E section is shown for each condition at x 10 magnification. (C) Clinical chemistry measurement after acute and chronic systemic administration of LNA-miR-199a-5p antisense probe (n=3 per group). Data are expressed as mean ± SEM, \*P<0.05. BUN: Blood Urea Nitrogen, ASAT: aspartate aminotransferase, ALAT: alanine aminotransferase, ALP: Alkaline Phosphatase, CPK: Creatine Phosphokinase, Chol: cholesterol, TG: triglycerides.



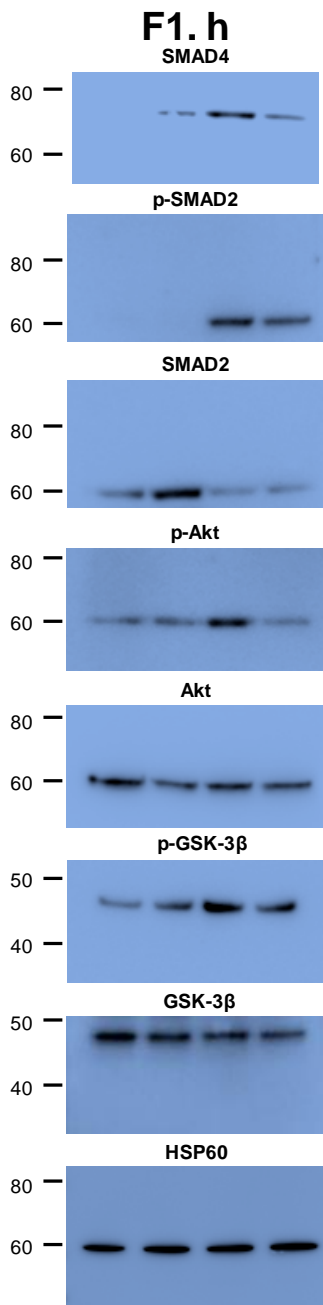

Fig. S9. Raw gel images corresponding to western blot shown on Figure 1.

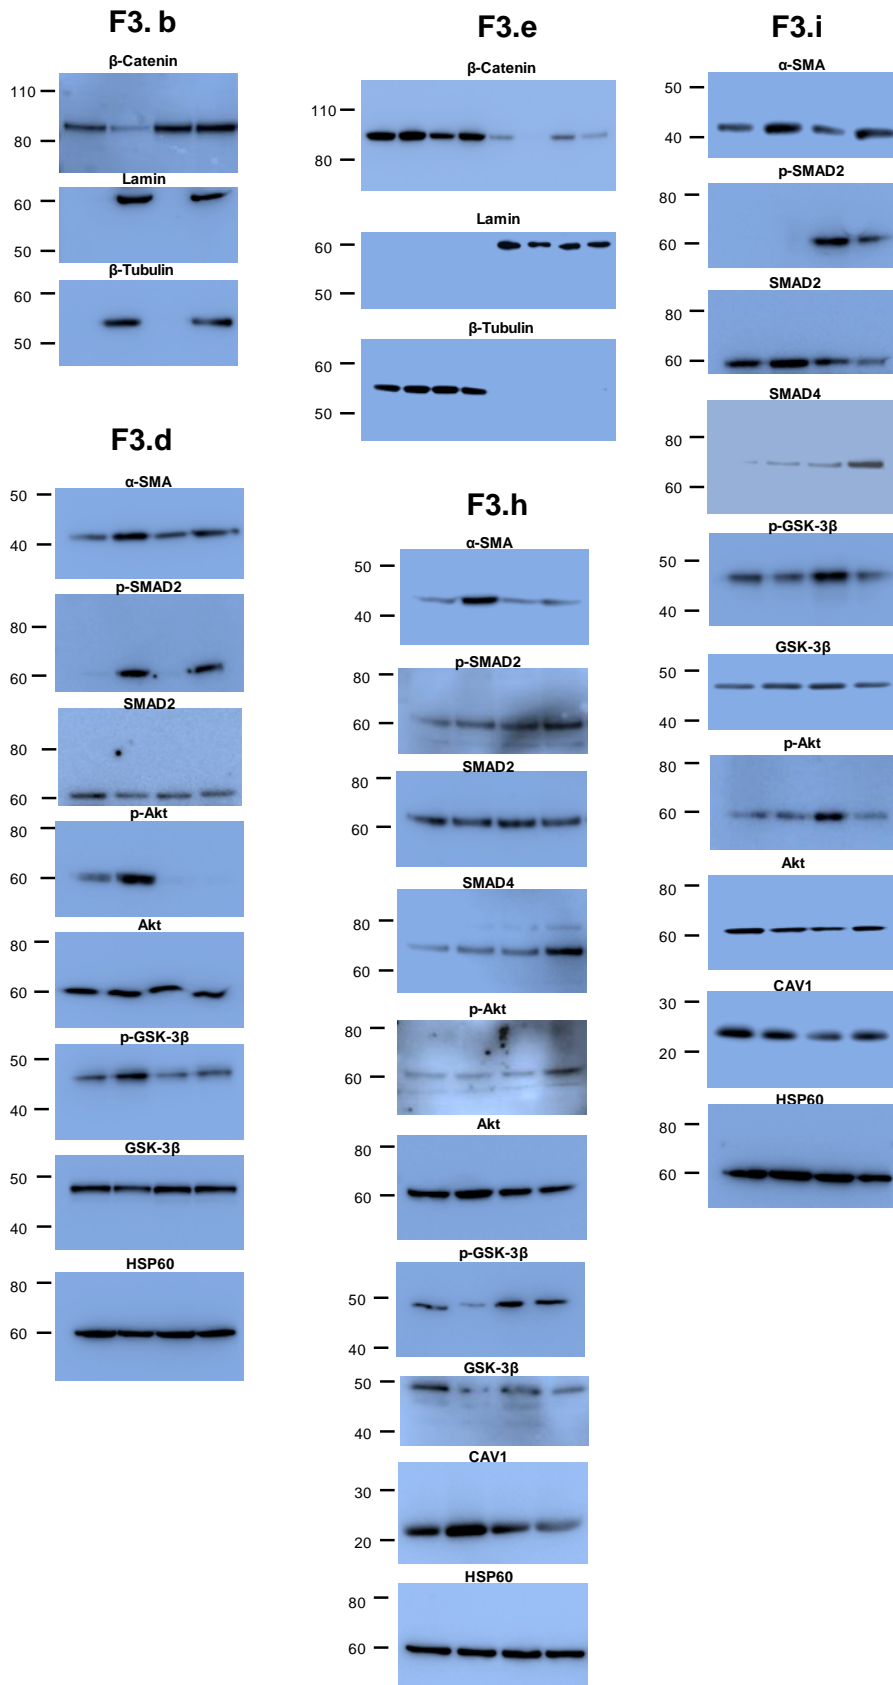

Fig. S10. Raw gel images corresponding to western blot shown on Figure 3.

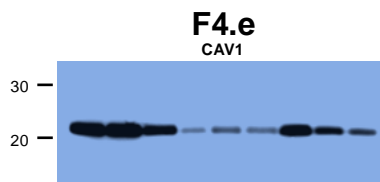

**Fig. S11. Raw gel images corresponding to western blot shown on Figure 4.**

**Table S1. List of the TGF- $\beta$  core signature of 419 coding genes significantly modulated by TGF- $\beta$  in lung fibroblasts, as identified by Ingenuity Pathway analysis (dataset 1).** The table indicates the Log Ratio (TGF- $\beta$  / control), and the predicted activation state of the TGF- $\beta$  pathway (ie: activated, inhibited or affected when the modulation has not been clearly demonstrated).

| Name     | Log2 FC | Prediction |
|----------|---------|------------|
| AASS     | -1.51   | Affected   |
| ABCE1    | 0.787   | Affected   |
| ABCG2    | -2.331  | Activated  |
| ACLY     | 1.114   | Activated  |
| ACSL3    | 0.835   | Affected   |
| ACTA2    | 3.885   | Activated  |
| ACTC1    | 8.242   | Activated  |
| ACTG2    | 2.631   | Activated  |
| ACTN1    | 0.931   | Activated  |
| ACVR1    | 1.053   | Activated  |
| ACVRL1   | -1.329  | Inhibited  |
| ADAM12   | 4.923   | Activated  |
| ADAM19   | 3.183   | Activated  |
| ADAMTS2  | 0.804   | Activated  |
| ADI1     | -0.797  | Activated  |
| ADM      | -2.302  | Activated  |
| ADORA2B  | -0.825  | Affected   |
| AKR1C1   | -2.899  | Affected   |
| ALDH18A1 | 1.145   | Activated  |
| ALDH2    | -1.057  | Activated  |
| AMD1     | 1.007   | Affected   |
| ANGPT1   | -0.784  | Activated  |
| ANGPTL4  | -3.925  | Inhibited  |
| ANKH     | 1.756   | Activated  |
| ANKLE2   | 1.517   | Affected   |
| ANKRD1   | 4.075   | Activated  |
| ANPEP    | -1.546  | Activated  |
| ANXA11   | -0.859  | Affected   |
| ANXA2    | 1.014   | Activated  |
| ANXA8    | 0.877   | Activated  |
| APOE     | -0.704  | Inhibited  |
| AQP1     | 0.772   | Affected   |
| ARF4     | 1.199   | Activated  |
| ARL4A    | 2.127   | Affected   |
| ARPC2    | 0.796   | Activated  |
| ASNS     | 2.345   | Activated  |
| ASS1     | 1.53    | Activated  |
| ASUN     | 1.539   | Inhibited  |
| ATF4     | 0.976   | Affected   |
| ATXN1    | 1.14    | Affected   |
| BAMBI    | -0.964  | Affected   |
| BCL2     | -1.701  | Inhibited  |
| BCL2L11  | -0.879  | Inhibited  |
| BGN      | 1.85    | Activated  |
| BHLHE40  | 3.156   | Activated  |
| BIN1     | -0.892  | Affected   |
| BMP1     | 0.738   | Activated  |
| BMP2     | -2.535  | Inhibited  |
| BMP4     | -2.35   | Affected   |
| BRIP1    | 0.767   | Inhibited  |
| BTG1     | -0.989  | Inhibited  |
| C1S      | -0.769  | Inhibited  |
| C5       | -1.066  | Affected   |
| C9orf3   | 1.271   | Affected   |
| CADM1    | 0.796   | Affected   |
| CALCOCO2 | 0.89    | Affected   |
| CALCR    | 0.941   | Affected   |

|          |        |           |
|----------|--------|-----------|
| CALD1    | 2.632  | Activated |
| CALM2    | 1.001  | Activated |
| CAMK2N1  | -0.791 | Inhibited |
| CAP1     | 1.222  | Activated |
| CARS     | 0.732  | Affected  |
| CASP1    | -1.775 | Inhibited |
| CASP4    | -1.004 | Activated |
| CASP8    | -1.014 | Affected  |
| CASP9    | -1.06  | Affected  |
| CAT      | -1.508 | Activated |
| CAV2     | 0.912  | Activated |
| CBFB     | 0.944  | Affected  |
| CCDC85B  | -1.357 | Affected  |
| CCL2     | -3.442 | Inhibited |
| CCNA2    | 0.849  | Inhibited |
| CCND1    | -0.773 | Inhibited |
| CCNG2    | -1.118 | Inhibited |
| CD4      | -0.888 | Activated |
| CD44     | -1.139 | Activated |
| CDC42EP4 | -1.616 | Affected  |
| CDH11    | 0.809  | Affected  |
| CDH2     | 2.97   | Activated |
| CDH4     | -0.798 | Inhibited |
| CDKN1C   | -1.599 | Inhibited |
| CDKN2B   | 4.303  | Activated |
| CDT1     | -1.342 | Affected  |
| CELF2    | -1.596 | Affected  |
| CHST11   | 1.463  | Activated |
| CITED2   | -1.353 | Activated |
| CKS2     | -1.009 | Affected  |
| CLIC4    | 0.909  | Activated |
| CLU      | -0.845 | Inhibited |
| CNN1     | 2.547  | Activated |
| CNN3     | 0.716  | Activated |
| COL11A1  | 1.932  | Activated |
| COL16A1  | 0.985  | Activated |
| COL18A1  | -0.863 | Affected  |
| COL1A1   | 1.545  | Activated |
| COL1A2   | 0.747  | Activated |
| COL4A1   | 2.652  | Activated |
| COL4A2   | 1.466  | Activated |
| COL4A6   | -2.537 | Inhibited |
| COL5A1   | 1.905  | Activated |
| COL6A1   | -0.884 | Inhibited |
| COL7A1   | 1.415  | Activated |
| COL8A1   | 1.819  | Activated |
| COMP     | 3.37   | Activated |
| CORIN    | -0.797 | Affected  |
| COTL1    | 0.774  | Activated |
| CPXM1    | -2.175 | Affected  |
| CREB3    | 0.702  | Affected  |
| CSF1     | -0.891 | Inhibited |
| CSPG4    | 0.961  | Activated |
| CSRP1    | 1.334  | Activated |
| CSRP2    | 2.004  | Activated |
| CTGF     | 1.443  | Activated |
| CTPS1    | 2.446  | Activated |
| CTSC     | -1.542 | Affected  |
| CTSH     | -0.843 | Inhibited |
| CTSK     | -1.246 | Inhibited |
| CXCL12   | -1.276 | Activated |
| CYR61    | 1.262  | Activated |
| DAD1     | 0.822  | Activated |

|         |        |           |
|---------|--------|-----------|
| DCN     | -1.038 | Activated |
| DDB2    | -0.761 | Affected  |
| DDIT4   | 1.62   | Affected  |
| DDR2    | 0.753  | Affected  |
| DDX21   | 1.137  | Affected  |
| DEPTOR  | -1.115 | Activated |
| DES     | 2.107  | Activated |
| DKC1    | 0.856  | Affected  |
| DNAJB4  | 1.014  | Affected  |
| DOCK4   | -1.122 | Inhibited |
| DOK1    | -0.862 | Inhibited |
| DPYSL3  | 0.9    | Affected  |
| DSG2    | 0.779  | Affected  |
| DSP     | 2.164  | Affected  |
| DTX4    | -3.173 | Affected  |
| DUSP4   | -2.578 | Inhibited |
| DYRK2   | 1.863  | Affected  |
| E2F1    | -0.773 | Inhibited |
| EDN1    | 3.829  | Activated |
| EDNRA   | -1.148 | Activated |
| EGR2    | 6.015  | Activated |
| EHMT2   | -0.964 | Affected  |
| ELN     | 2.7    | Activated |
| EPHB2   | 1.259  | Activated |
| EPRS    | 1.53   | Activated |
| F2R     | -1.479 | Inhibited |
| FAM110B | -0.893 | Affected  |
| FAM3C   | 0.722  | Activated |
| FAP     | 0.833  | Activated |
| FBLN5   | 1.372  | Activated |
| FBN1    | 0.857  | Activated |
| FDXR    | -0.77  | Affected  |
| FERMT2  | 1.835  | Activated |
| FGF2    | 1.382  | Activated |
| FGF5    | -0.724 | Inhibited |
| FGF9    | -2.547 | Affected  |
| FHL1    | -1.351 | Activated |
| FILIP1L | 0.74   | Activated |
| FLNA    | 0.727  | Activated |
| FLNB    | 2.09   | Activated |
| FN1     | 2.231  | Activated |
| FNBP1   | -0.861 | Affected  |
| FNDC3B  | 0.849  | Activated |
| FOSL2   | -0.815 | Inhibited |
| FOXC1   | -1.532 | Inhibited |
| FOXC2   | 1.656  | Activated |
| FSTL3   | 2.372  | Activated |
| FTH1    | -1.096 | Activated |
| FTL     | -1.204 | Activated |
| FZD1    | -1.411 | Inhibited |
| GADD45B | 2.706  | Activated |
| GAL     | 1.229  | Activated |
| GALM    | -1.826 | Activated |
| GARS    | 1.675  | Activated |
| GAS1    | -2.466 | Affected  |
| GBP1    | 1.147  | Inhibited |
| GBP2    | -0.897 | Affected  |
| GCLC    | -0.745 | Activated |
| GDF6    | 1.11   | Activated |
| GFPT2   | 0.863  | Affected  |
| GLI1    | 2.005  | Activated |
| GLI2    | 0.97   | Activated |
| GLRX2   | 1.399  | Affected  |



|         |        |           |
|---------|--------|-----------|
| GMPR    | -1.477 | Affected  |
| GNA13   | 1.037  | Activated |
| GNB4    | 0.854  | Activated |
| GNG2    | -1.3   | Inhibited |
| GPRC5A  | -2.206 | Affected  |
| GRIA1   | -2.273 | Inhibited |
| GYG1    | -0.989 | Affected  |
| H1FX    | -0.715 | Affected  |
| H6PD    | -0.924 | Activated |
| HADH    | -0.896 | Affected  |
| HAPLN3  | 0.919  | Activated |
| HBEGF   | 2.932  | Activated |
| HEBP1   | -0.99  | Affected  |
| HGF     | -2.305 | Activated |
| HIF1A   | 0.912  | Activated |
| HLA-DMA | -1.294 | Affected  |
| HMGA1   | -1.09  | Activated |
| HMGA2   | -0.738 | Inhibited |
| HMOX1   | -1.145 | Inhibited |
| HOXB5   | -1.085 | Activated |
| HSD17B6 | 2.473  | Affected  |
| HSPA5   | 0.985  | Activated |
| HSPB1   | 1.263  | Activated |
| HTRA1   | 1.331  | Activated |
| IARS    | 0.895  | Activated |
| ID1     | 0.988  | Activated |
| IER3    | 1.106  | Activated |
| IFIT3   | -2.159 | Affected  |
| IFRD1   | 1.375  | Affected  |
| IGF1    | 6.399  | Inhibited |
| IGFBP2  | -1.159 | Activated |
| IGFBP3  | 4.697  | Activated |
| IGFBP4  | -1.908 | Affected  |
| IGFBP5  | -1.983 | Activated |
| IGFBP6  | -1.398 | Activated |
| IGFBP7  | 0.847  | Activated |
| IL11    | 2.779  | Activated |
| IL12A   | -1.267 | Inhibited |
| IL17D   | 0.77   | Inhibited |
| IL1R1   | -1.794 | Activated |
| IL21    | 0.895  | Activated |
| IL23A   | 0.89   | Activated |
| IL6     | 0.823  | Activated |
| IL6R    | -2.952 | Inhibited |
| IMPDH1  | 1.631  | Inhibited |
| INHBA   | 2.441  | Activated |
| IRAK3   | -0.707 | Inhibited |
| ITGA1   | 2.213  | Activated |
| ITGA11  | 1.801  | Activated |
| ITGA5   | 1.219  | Activated |
| ITGAV   | 1.119  | Activated |
| ITGB1   | 0.863  | Activated |
| ITGB3   | 2.266  | Activated |
| ITGB5   | 0.758  | Activated |
| ITGBL1  | 1.9    | Activated |
| ITIH3   | 0.837  | Inhibited |
| ITPR1   | 0.75   | Inhibited |
| JADE2   | -1.55  | Affected  |
| JAG1    | -1.136 | Inhibited |
| JUN     | -1.394 | Inhibited |
| JUNB    | 2.095  | Activated |
| KCNG1   | 2.23   | Affected  |
| KDEL2   | 1.03   | Activated |

|          |        |           |
|----------|--------|-----------|
| KDELR3   | 1.027  | Activated |
| KIAA1199 | -2.147 | Affected  |
| KIT      | -3.025 | Inhibited |
| KITLG    | -2.299 | Activated |
| KLF10    | 2.008  | Activated |
| KRT18    | 2.162  | Activated |
| LDHA     | 0.864  | Activated |
| LIFR     | -1.493 | Inhibited |
| LIMK2    | 1.646  | Affected  |
| LIMS1    | 2.468  | Activated |
| LOX      | 2.648  | Activated |
| LOXL2    | 0.718  | Activated |
| LPAR1    | -2.315 | Activated |
| LTBP1    | 1.015  | Activated |
| LTBP2    | 1.946  | Activated |
| MAOA     | -1.274 | Affected  |
| MAPK6    | 1.229  | Activated |
| MCM2     | -1.064 | Activated |
| MFAP2    | 2.221  | Activated |
| MFAP4    | 1.156  | Activated |
| MGAT3    | -1.047 | Activated |
| MGMT     | -1.027 | Inhibited |
| MID1     | -1.301 | Affected  |
| MITF     | -1.716 | Activated |
| MLXIP    | 0.749  | Activated |
| MMP10    | 0.802  | Activated |
| MMP11    | 0.876  | Activated |
| MMP2     | 0.749  | Activated |
| MPV17L   | -0.794 | Activated |
| MRE11A   | 1.818  | Affected  |
| MSN      | 0.966  | Activated |
| MTHFD2   | 2.249  | Affected  |
| MXI1     | -0.939 | Inhibited |
| MYH11    | 4.228  | Activated |
| MYH9     | 0.826  | Activated |
| MYL12A   | 0.829  | Activated |
| MYOCD    | 0.885  | Activated |
| NCOA3    | 0.716  | Activated |
| NDRG4    | -1.015 | Affected  |
| NDST1    | 0.971  | Activated |
| NEDD9    | 1.22   | Activated |
| NEGR1    | 0.842  | Activated |
| NFATC2   | -0.91  | Inhibited |
| NGF      | 2.6    | Activated |
| NIPA2    | 0.846  | Affected  |
| NME1     | 1.158  | Activated |
| NNMT     | 2.112  | Activated |
| NOV      | -2.859 | Activated |
| NOX4     | 4.454  | Activated |
| NPAS2    | 1.275  | Affected  |
| NPTXR    | -0.89  | Activated |
| NR1H3    | -1.387 | Affected  |
| NRP1     | -1.406 | Inhibited |
| NT5E     | -0.74  | Inhibited |
| NUAK1    | 4.079  | Affected  |
| NUCB2    | 0.827  | Activated |
| NUPR1    | 0.831  | Activated |
| OLFM2    | 0.854  | Activated |
| P2RX6    | -1.725 | Affected  |
| P4HA1    | 1.368  | Activated |
| PAPPA    | -1.778 | Affected  |
| PATZ1    | -1.063 | Affected  |
| PAX8     | -1.187 | Activated |

|          |        |           |
|----------|--------|-----------|
| PDGFA    | 2.088  | Activated |
| PDGFRA   | -1.761 | Inhibited |
| PDGFRB   | 0.726  | Activated |
| PDHB     | 0.87   | Activated |
| PDLIM4   | 1.302  | Activated |
| PDLIM5   | 2.374  | Affected  |
| PDLIM7   | 0.812  | Activated |
| PFN2     | -0.987 | Activated |
| PGRMC2   | 1.734  | Affected  |
| PHGDH    | 1.139  | Inhibited |
| PI4K2B   | 0.928  | Activated |
| PKIG     | -0.849 | Inhibited |
| PLAT     | -2.171 | Inhibited |
| PLAU     | -2.166 | Inhibited |
| PLAUR    | 0.738  | Activated |
| PLEK2    | 1.125  | Activated |
| PLK2     | -1.482 | Affected  |
| PLOD1    | 0.745  | Activated |
| PLOD2    | 2.398  | Activated |
| PLS3     | 1.261  | Activated |
| PLSCR1   | -1.492 | Activated |
| PLXNC1   | -3.358 | Inhibited |
| PMEPA1   | 2.224  | Activated |
| PPARG    | -2.769 | Activated |
| PPP1R3C  | 1.186  | Affected  |
| PPP2R2A  | 0.803  | Activated |
| PRDM1    | 1.771  | Activated |
| PRKCA    | 0.943  | Affected  |
| PRPS1    | 1.879  | Activated |
| PSME4    | 0.961  | Affected  |
| PSPH     | 1.422  | Inhibited |
| PTEN     | 0.942  | Inhibited |
| PTGER2   | -2.637 | Inhibited |
| PTH1R    | -0.905 | Inhibited |
| PTHLH    | 1.373  | Activated |
| PTPRN    | 1.109  | Activated |
| PTX3     | -3.459 | Affected  |
| RAB18    | 0.801  | Activated |
| RAB1A    | 0.807  | Activated |
| RAB6A    | 0.782  | Activated |
| RAPGEF3  | 0.732  | Affected  |
| RASGRP1  | 0.702  | Activated |
| RASGRP3  | 3.782  | Activated |
| RASL11B  | 1.22   | Activated |
| RDH11    | 0.8    | Inhibited |
| RGCC     | -3.176 | Inhibited |
| RHOU     | -1.164 | Inhibited |
| RIN1     | -1.824 | Activated |
| ROR1     | -1.147 | Affected  |
| RRAD     | 1.034  | Activated |
| RSU1     | 1.133  | Activated |
| RUNX1    | 1.37   | Activated |
| RYBP     | 0.936  | Affected  |
| S100A10  | -0.785 | Inhibited |
| S100A4   | -0.769 | Inhibited |
| S1PR3    | -1.449 | Inhibited |
| SALL2    | -0.784 | Activated |
| SAR1B    | 0.799  | Inhibited |
| SCD      | 1.356  | Activated |
| SDC4     | -0.931 | Affected  |
| SDPR     | -1.227 | Inhibited |
| SEC61B   | 0.845  | Affected  |
| SELENBP1 | -1.341 | Activated |

|           |        |           |
|-----------|--------|-----------|
| SEMA3A    | -1.64  | Activated |
| SEMA3B    | -0.726 | Inhibited |
| SEMA7A    | 2.857  | Activated |
| SERP1     | 1.515  | Affected  |
| SERPINB1  | -0.706 | Inhibited |
| SERPINE1  | 2.758  | Activated |
| SERPINE2  | 3.799  | Activated |
| SFRP1     | -1.751 | Affected  |
| SHOC2     | 1.902  | Affected  |
| SLC12A7   | -2.267 | Affected  |
| SLC39A14  | 2.146  | Affected  |
| SMAD3     | -2.523 | Inhibited |
| SMAD6     | -2.389 | Inhibited |
| SNAI2     | -1.043 | Inhibited |
| SOCS1     | -2.693 | Inhibited |
| SOCS3     | -1.758 | Inhibited |
| SOD3      | -1.423 | Inhibited |
| SPRY1     | -3.154 | Affected  |
| ST3GAL5   | -0.956 | Affected  |
| STC2      | -1.038 | Affected  |
| STRAP     | 0.743  | Affected  |
| SVEP1     | -2.171 | Affected  |
| TCN2      | -1.35  | Affected  |
| TGFB2     | 1.467  | Inhibited |
| TGFB3     | 1.819  | Inhibited |
| TGFBR2    | -0.995 | Inhibited |
| TGM2      | -1.414 | Inhibited |
| TNFAIP3   | -0.759 | Inhibited |
| TNFRSF11B | -1.976 | Inhibited |
| TNFRSF14  | -1.672 | Affected  |
| TRIM9     | 0.789  | Affected  |
| TSC22D3   | 1.404  | Affected  |
| TUBB3     | -0.94  | Inhibited |
| TWIST1    | -0.811 | Inhibited |
| TWIST2    | -1.295 | Inhibited |
| TXNIP     | -1.594 | Inhibited |
| TXNRD1    | -0.796 | Affected  |
| UBE2J1    | 1.379  | Affected  |
| UCK2      | 1.193  | Affected  |
| UNC119    | -0.761 | Affected  |
| USO1      | 0.748  | Inhibited |
| VEGFC     | -1.049 | Inhibited |
| XRCC4     | 1.365  | Affected  |
| ZEB2      | -0.703 | Inhibited |
| ZFP36     | -1.074 | Inhibited |
| ZFP36L2   | -1.492 | Affected  |
| ZNF365    | 2.187  | Affected  |

**Table S2. List of putative lncRNAs significantly modulated by TGF- $\beta$  in lung fibroblasts (dataset 1).** The thresholds used for selection of the lncRNA candidates are log<sub>2</sub> Base Mean >5, Log<sub>2</sub> FC>1 and adj.Pval <0.01.

| Gene Name   | Length | ENTREZ ID | Description                                                            | BIOTYPE    | Base Mean | log <sub>2</sub> FC | Adj. P Value |
|-------------|--------|-----------|------------------------------------------------------------------------|------------|-----------|---------------------|--------------|
| ANXA2P2     | 1310   | 304       | annexin A2 pseudogene 2                                                | pseudogene | 48741     | 1.01                | 1.04E-20     |
| APCDD1L-AS1 | 4940   | 149773    | APCDD1L antisense RNA 1 (head to head)                                 | antisense  | 373       | 1.82                | 2.69E-27     |
| ATF4P4      | 2136   | 100127952 | activating transcription factor 4 pseudogene 4                         | pseudogene | 922       | 1.04                | 1.89E-14     |
| BAIAP2-AS1  | 4590   | 440465    | BAIAP2 antisense RNA 1 (head to head)                                  | lincRNA    | 759       | -1.45               | 9.82E-24     |
| BLZF2P      | 1130   | 317729    | basic leucine zipper nuclear factor 2 pseudogene                       | pseudogene | 41        | 1.25                | 1.19E-03     |
| C17orf82    | 1530   | 388407    | chromosome 17 open reading frame 82                                    | lincRNA    | 55        | -1.12               | 1.60E-03     |
| C1orf132    | 15647  | 100128537 | chromosome 1 open reading frame 132                                    | lincRNA    | 81        | -1.25               | 2.48E-05     |
| C1orf220    | 2775   | 400798    | chromosome 1 open reading frame 220                                    | lincRNA    | 33        | -1.43               | 8.22E-04     |
| CAP1P2      | 1409   | 399748    | CAP1 pseudogene 2                                                      | pseudogene | 1296      | 1.26                | 2.20E-22     |
| CCDC144CP   | 8558   | 348254    | coiled-coil domain containing 144C, pseudogene                         | pseudogene | 119       | 1.76                | 4.96E-12     |
| CMAHP       | 4328   | 8418      | cytidine monophospho-N-acetylneuraminic acid hydroxylase, pseudogene   | pseudogene | 64        | 1.11                | 1.05E-03     |
| COX20P1     | 357    | 100507102 | COX20 cytochrome c oxidase assembly factor pseudogene 1                | pseudogene | 248       | 1.20                | 2.18E-09     |
| DAOA-AS1    | 2482   | 282706    | DAOA antisense RNA 1                                                   | antisense  | 164       | -1.95               | 2.16E-16     |
| DCAF13P1    | 1330   | 100129009 | DDB1 and CUL4 associated factor 13 pseudogene 1                        | pseudogene | 94        | 1.02                | 6.68E-04     |
| DNAJC27-AS1 | 5651   | 729723    | DNAJC27 antisense RNA 1                                                | antisense  | 40        | -1.41               | 6.50E-04     |
| DNM3OS      | 7956   | 100628315 | DNM3 opposite strand/antisense RNA                                     | antisense  | 418       | 2.36                | 6.58E-33     |
| EIF2S2P4    | 1342   | 728350    | eukaryotic translation initiation factor 2 subunit 2 beta pseudogene 4 | pseudogene | 2574      | 1.19                | 1.31E-18     |
| ELL2P1      | 1906   | 646270    | elongation factor for RNA polymerase II 2 pseudogene 1                 | pseudogene | 716       | -1.00               | 7.47E-12     |
| ENTPD1-AS1  | 12528  | 728558    | ENTPD1 antisense RNA 1                                                 | antisense  | 256       | 1.87                | 7.33E-19     |
| FAM212B-AS1 | 2131   | 100506343 | FAM212B antisense RNA 1                                                | antisense  | 73        | -1.02               | 1.23E-03     |
| FAM86EP     | 3476   | 348926    | family with sequence similarity 86, member A pseudogene                | pseudogene | 159       | -1.91               | 3.18E-17     |
| FAM86FP     | 994    | 653113    | family with sequence similarity 86, member A pseudogene                | pseudogene | 187       | -1.59               | 5.39E-14     |
| FAM86HP     | 1301   | 729375    | family with sequence similarity 86, member A pseudogene                | pseudogene | 95        | -1.12               | 1.13E-04     |
| FAM92A1P1   | 890    | 729073    | family with sequence similarity 92, member A2 (pseudogene)             | pseudogene | 418       | -1.81               | 2.94E-23     |
| FENDRR      | 6785   | 400550    | FOXF1 adjacent non-coding developmental regulatory RNA                 | lincRNA    | 7294      | -2.28               | 2.51E-91     |
| FER1L4      | 9212   | 80307     | fer-1 like family member 4, pseudogene                                 | pseudogene | 74        | -1.41               | 5.42E-06     |
| FTH1P10     | 930    | 2502      | ferritin, heavy polypeptide 1 pseudogene 10                            | pseudogene | 3148      | -1.06               | 5.58E-18     |
| FTH1P11     | 551    | 2503      | ferritin, heavy polypeptide 1 pseudogene 11                            | pseudogene | 3005      | -1.09               | 5.00E-19     |
| FTH1P23     | 550    | 100420300 | ferritin, heavy polypeptide 1 pseudogene 23                            | pseudogene | 1859      | -1.01               | 1.14E-13     |
| FTH1P5      | 545    | 2509      | ferritin, heavy polypeptide 1 pseudogene 5                             | pseudogene | 640       | -1.08               | 2.74E-13     |
| FTH1P7      | 552    | 2500      | ferritin, heavy polypeptide 1 pseudogene 7                             | pseudogene | 2183      | -1.01               | 5.36E-16     |
| FTH1P8      | 1028   | 2501      | ferritin, heavy polypeptide 1 pseudogene 8                             | pseudogene | 3215      | -1.08               | 1.05E-17     |
| FTLP2       | 528    | 392437    | ferritin, light polypeptide pseudogene 2                               | pseudogene | 962       | -1.18               | 1.93E-13     |
| FTLP3       | 540    | 284764    | ferritin, light polypeptide pseudogene 3                               | pseudogene | 17604     | -1.15               | 3.32E-19     |
| GBP1P1      | 2352   | 400759    | guanylate binding protein 1                                            | pseudogene | 139       | 1.15                | 3.13E-06     |

|            |      |           |                                                              |            |      |       |          |
|------------|------|-----------|--------------------------------------------------------------|------------|------|-------|----------|
| GRK6P1     | 1775 | 2871      | pseudogene 1<br>G protein-coupled receptor kinase 6          | pseudogene | 51   | 1.21  | 1.23E-03 |
| GTF2IRD2P1 | 3217 | 401375    | pseudogene 1<br>GTF2I repeat domain containing 2             | pseudogene | 545  | -1.12 | 1.76E-13 |
| H1FX-AS1   | 3420 | 339942    | pseudogene 1<br>H1FX antisense RNA 1                         | antisense  | 69   | -1.62 | 4.56E-07 |
| HERC2P8    | 6014 | 440366    | hect domain and RLD 2                                        | pseudogene | 58   | -1.17 | 5.82E-04 |
| HMGA1P1    | 1062 | 203477    | pseudogene 8<br>high mobility group AT-hook 1                | pseudogene | 73   | -1.12 | 3.46E-04 |
| HMGA1P2    | 324  | 171559    | pseudogene 1<br>high mobility group AT-hook 1                | pseudogene | 170  | -1.12 | 3.67E-07 |
| HMGA1P8    | 321  | 100130009 | pseudogene 2<br>high mobility group AT-hook 1                | pseudogene | 161  | -1.07 | 2.66E-06 |
| HOXA-AS2   | 5281 | 285943    | pseudogene 8<br>HOXA cluster antisense RNA 2                 | antisense  | 147  | -1.19 | 4.59E-07 |
| HS6ST1P1   | 1235 | 388605    | heparan sulfate 6-O-<br>sulfotransferase 1 pseudogene 1      | pseudogene | 413  | -2.12 | 4.59E-30 |
| HSFY6P     | 403  | 106480722 | heat shock transcription factor, Y-<br>linked 6, pseudogene  | pseudogene | 42   | 1.44  | 1.83E-04 |
| HSP90B2P   | 2384 | 7190      | heat shock protein 90kDa beta<br>family member 2, pseudogene | pseudogene | 560  | 1.14  | 2.28E-13 |
| HSP90B3P   | 1796 | 343477    | heat shock protein 90kDa beta<br>family member 3, pseudogene | pseudogene | 287  | 1.23  | 1.93E-11 |
| HSPA9P1    | 2029 | 266724    | heat shock protein family A (Hsp70)<br>member 9 pseudogene 1 | pseudogene | 352  | 1.07  | 3.37E-10 |
| HSPB1P1    | 256  | 653553    | heat shock protein family B (small)<br>member 1 pseudogene 1 | pseudogene | 1014 | 1.30  | 2.81E-18 |
| HSPB1P2    | 1092 | 653364    | heat shock protein family B (small)<br>member 1 pseudogene 2 | pseudogene | 325  | 1.21  | 1.85E-08 |
| HTR7P1     | 2299 | 93164     | 5-hydroxytryptamine receptor 7                               | pseudogene | 295  | -1.25 | 1.03E-11 |
| JHDM1D-AS1 | 2380 | 100134229 | pseudogene 1<br>JHDM1D antisense RNA 1 (head to<br>head)     | antisense  | 47   | 1.42  | 1.21E-04 |
| KCNJ2-AS1  | 2442 | 400617    | KCNJ2 antisense RNA 1 (head to<br>head)                      | antisense  | 50   | -4.38 | 8.08E-22 |
| KRT18P10   | 1287 | 360019    | keratin 18 pseudogene 10                                     | pseudogene | 170  | 2.06  | 2.07E-19 |
| KRT18P11   | 1283 | 3876      | keratin 18 pseudogene 11                                     | pseudogene | 201  | 2.07  | 1.68E-20 |
| KRT18P15   | 1291 | 729211    | keratin 18 pseudogene 15                                     | pseudogene | 52   | 1.98  | 1.85E-08 |
| KRT18P17   | 1279 | 344866    | keratin 18 pseudogene 17                                     | pseudogene | 51   | 1.32  | 3.49E-04 |
| KRT18P28   | 1332 | 343326    | keratin 18 pseudogene 28                                     | pseudogene | 62   | 2.11  | 1.95E-09 |
| KRT18P29   | 1267 | 729050    | keratin 18 pseudogene 29                                     | pseudogene | 34   | 1.72  | 3.59E-05 |
| KRT18P38   | 1282 | 441133    | keratin 18 pseudogene 38                                     | pseudogene | 81   | 1.86  | 7.84E-10 |
| LHFPL3-AS1 | 3039 | 645591    | LHFPL3 antisense RNA 1                                       | antisense  | 1524 | -2.04 | 6.44E-61 |
| LIFR-AS1   | 5098 | 100506495 | LIFR antisense RNA 1                                         | antisense  | 49   | -2.68 | 4.38E-12 |
| LINC00265  | 3115 | 349114    | long intergenic non-protein coding<br>RNA 265                | lincRNA    | 77   | -1.86 | 5.68E-10 |
| LINC00320  | 2325 | 387486    | long intergenic non-protein coding<br>RNA 320                | lincRNA    | 1242 | 1.06  | 1.00E-14 |
| LINC00346  | 585  | 283487    | long intergenic non-protein coding<br>RNA 346                | lincRNA    | 39   | -1.34 | 1.13E-03 |
| LINC00472  | 3443 | 79940     | long intergenic non-protein coding<br>RNA 472                | lincRNA    | 44   | -1.01 | 9.74E-03 |
| LINC00475  | 3858 | 158314    | long intergenic non-protein coding<br>RNA 475                | lincRNA    | 1380 | -1.34 | 3.30E-24 |
| LINC00476  | 5100 | 100128782 | long intergenic non-protein coding<br>RNA 476                | lincRNA    | 96   | -1.30 | 1.79E-06 |
| LINC00535  | 2595 | 642924    | long intergenic non-protein coding<br>RNA 535                | antisense  | 38   | -3.11 | 4.16E-13 |
| LINC00607  | 5628 | 646324    | long intergenic non-protein coding<br>RNA 607                | lincRNA    | 111  | 3.29  | 2.49E-27 |
| LINC00641  | 5715 | 283624    | long intergenic non-protein coding<br>RNA 641                | lincRNA    | 256  | 1.00  | 1.55E-07 |
| LINC00643  | 2871 | 646113    | long intergenic non-protein coding<br>RNA 643                | lincRNA    | 37   | 2.45  | 2.73E-09 |
| LINC00662  | 7958 | 148189    | long intergenic non-protein coding<br>RNA 662                | lincRNA    | 653  | 1.83  | 3.62E-36 |
| LINC00880  | 2018 | 339894    | long intergenic non-protein coding<br>RNA 880                | lincRNA    | 44   | 4.16  | 3.12E-19 |
| LINC00900  | 4766 | 283143    | long intergenic non-protein coding                           | lincRNA    | 233  | -1.24 | 1.79E-10 |



|            |       |           |                                                                                                                               |            |      |       |          |
|------------|-------|-----------|-------------------------------------------------------------------------------------------------------------------------------|------------|------|-------|----------|
| LINC00957  | 2703  | 255031    | RNA 900<br>long intergenic non-protein coding<br>RNA 957                                                                      | lincRNA    | 43   | 1.16  | 2.29E-03 |
| LINC00968  | 2840  | 100507632 | long intergenic non-protein coding<br>RNA 968                                                                                 | lincRNA    | 40   | -1.15 | 4.59E-03 |
| MAPK6PS4   | 2142  | 286065    | mitogen-activated protein kinase 6<br>pseudogene 4                                                                            | pseudogene | 35   | 1.20  | 5.37E-03 |
| MBNL1-AS1  | 6585  | 401093    | MBNL1 antisense RNA 1                                                                                                         | antisense  | 1051 | 1.46  | 2.09E-24 |
| MESTP1     | 994   | 338470    | mesoderm specific transcript<br>pseudogene 1                                                                                  | pseudogene | 1242 | 2.21  | 2.16E-65 |
| MESTP3     | 968   | 645641    | mesoderm specific transcript<br>pseudogene 3                                                                                  | pseudogene | 301  | 2.11  | 7.89E-31 |
| MESTP4     | 1204  | 131572    | mesoderm specific transcript<br>pseudogene 4                                                                                  | pseudogene | 40   | 1.91  | 1.82E-06 |
| MFI2-AS1   | 1139  | 100507057 | MFI2 antisense RNA 1                                                                                                          | antisense  | 52   | -1.69 | 2.39E-06 |
| MIR155HG   | 1600  | 114614    | MIR155 host gene                                                                                                              | lincRNA    | 36   | -1.53 | 3.18E-04 |
| MIR181A1HG | 3250  | 100131234 | MIR181A1 host gene                                                                                                            | lincRNA    | 113  | 1.70  | 3.69E-10 |
| MIR181A2HG | 662   | 100379345 | MIR181A2 host gene                                                                                                            | antisense  | 122  | 1.49  | 1.56E-09 |
| MIR210HG   | 2321  | 100506211 | MIR210 host gene                                                                                                              | lincRNA    | 111  | 1.10  | 6.58E-05 |
| MIR22HG    | 2968  | 84981     | MIR22 host gene                                                                                                               | lincRNA    | 3225 | 1.49  | 9.29E-32 |
| MSTO2P     | 2647  | 100129405 | misato family member 2,<br>pseudogene                                                                                         | pseudogene | 167  | 1.01  | 9.63E-06 |
| MTHFD2P5   | 844   | 442707    | methylenetetrahydrofolate<br>dehydrogenase (NADP+<br>dependent) 2,<br>methenyltetrahydrofolate<br>cyclohydrolase pseudogene 5 | pseudogene | 45   | 1.69  | 7.24E-06 |
| MTHFD2P7   | 983   | 442098    | methylenetetrahydrofolate<br>dehydrogenase (NADP+<br>dependent) 2,<br>methenyltetrahydrofolate<br>cyclohydrolase pseudogene 7 | pseudogene | 320  | 2.05  | 1.21E-23 |
| MYO15B     | 12862 | 80022     | myosin XVb                                                                                                                    | pseudogene | 127  | -1.24 | 6.51E-07 |
| NBPF2P     | 710   | 343381    | neuroblastoma breakpoint family<br>member 2, pseudogene                                                                       | pseudogene | 417  | -1.28 | 1.12E-13 |
| NEXN-AS1   | 2583  | 374987    | NEXN antisense RNA 1                                                                                                          | antisense  | 83   | -1.87 | 4.55E-10 |
| NRBF2P4    | 850   | 728381    | nuclear receptor binding factor 2<br>pseudogene 4                                                                             | pseudogene | 45   | 1.42  | 1.19E-04 |
| OFD1P9Y    | 1491  | 386693    | OFD1 pseudogene 9, Y-linked                                                                                                   | pseudogene | 86   | 1.56  | 1.36E-07 |
| OSTCP2     | 444   | 646567    | oligosaccharyltransferase complex<br>subunit pseudogene 2                                                                     | pseudogene | 97   | 1.17  | 1.67E-04 |
| OSTCP4     | 449   | 645264    | oligosaccharyltransferase complex<br>subunit pseudogene 4                                                                     | pseudogene | 121  | 1.38  | 3.40E-08 |
| PDCL3P4    | 720   | 285359    | phosducin-like 3 pseudogene 4                                                                                                 | pseudogene | 70   | 1.24  | 6.78E-05 |
| PDCL3P5    | 722   | 644850    | phosducin-like 3 pseudogene 5                                                                                                 | pseudogene | 99   | 1.11  | 6.06E-05 |
| PGDP1      | 1441  | 342705    | phosphogluconate dehydrogenase<br>pseudogene 1                                                                                | pseudogene | 303  | -1.07 | 8.88E-09 |
| PPP1R14BP3 | 445   | 100507617 | protein phosphatase 1 regulatory<br>inhibitor subunit 14B pseudogene 3                                                        | pseudogene | 2524 | 1.02  | 1.32E-13 |
| PRPS1P2    | 937   | 100421295 | phosphoribosyl pyrophosphate<br>synthetase 1 pseudogene 2                                                                     | pseudogene | 57   | 2.08  | 9.42E-10 |
| PSAT1P3    | 1111  | 729779    | phosphoserine aminotransferase 1<br>pseudogene 3                                                                              | pseudogene | 182  | 1.99  | 2.37E-19 |
| PSAT1P4    | 529   | 100287630 | phosphoserine aminotransferase 1<br>pseudogene 4                                                                              | pseudogene | 62   | 1.85  | 2.73E-08 |
| PSMG3-AS1  | 6264  | 114796    | PSMG3 antisense RNA 1 (head to<br>head)                                                                                       | lincRNA    | 240  | -1.01 | 5.37E-06 |
| RASA4DP    | 1199  | 100133005 | RAS p21 protein activator 4CD,<br>pseudogene                                                                                  | pseudogene | 4425 | 2.26  | 4.03E-85 |
| RBMY2WP    | 894   | 379011    | RNA binding motif protein, Y-linked,<br>family 2, member W pseudogene                                                         | pseudogene | 33   | 1.23  | 4.62E-03 |
| RPSAP52    | 1144  | 204010    | ribosomal protein SA pseudogene<br>52                                                                                         | pseudogene | 58   | -1.32 | 2.76E-04 |
| RUSC1-AS1  | 3516  | 284618    | RUSC1 antisense RNA 1                                                                                                         | antisense  | 58   | -1.18 | 8.92E-04 |
| SBDSP1     | 3736  | 155370    | Shwachman-Bodian-Diamond<br>syndrome pseudogene 1                                                                             | pseudogene | 944  | 1.12  | 7.67E-14 |
| SCDP1      | 1081  | 645313    | stearoyl-CoA desaturase (delta-9-<br>desaturase) pseudogene 1                                                                 | pseudogene | 280  | 1.39  | 3.76E-14 |

|             |      |           |                                                               |            |     |       |          |
|-------------|------|-----------|---------------------------------------------------------------|------------|-----|-------|----------|
| SEC63P1     | 1258 | 100420341 | SEC63 homolog, protein translocation regulator pseudogene 1   | pseudogene | 260 | 1.09  | 1.60E-06 |
| SERPINH1P1  | 1249 | 158172    | serpin peptidase inhibitor, clade H1, pseudogene 1            | pseudogene | 228 | 1.29  | 6.43E-10 |
| SERTAD4-AS1 | 1004 | 574036    | SERTAD4 antisense RNA 1                                       | antisense  | 94  | 1.52  | 2.99E-08 |
| SH3RF3-AS1  | 1604 | 100287216 | SH3RF3 antisense RNA 1                                        | lincRNA    | 119 | 1.69  | 1.23E-11 |
| SLC2A1-AS1  | 3364 | 440584    | SLC2A1 antisense RNA 1                                        | lincRNA    | 84  | -1.25 | 1.84E-05 |
| SLC9A7P1    | 3311 | 121456    | solute carrier family 9 member 7 pseudogene 1                 | pseudogene | 76  | 1.22  | 8.35E-05 |
| SNX29P1     | 1341 | 100652781 | sorting nexin 29 pseudogene 1                                 | pseudogene | 55  | -1.40 | 8.63E-05 |
| SNX29P2     | 9520 | 440352    | sorting nexin 29 pseudogene 2                                 | lincRNA    | 167 | -2.74 | 1.54E-26 |
| SOCS2-AS1   | 3816 | 144481    | SOCS2 antisense RNA 1                                         | antisense  | 60  | -1.77 | 1.88E-06 |
| TLR8-AS1    | 1349 | 349408    | TLR8 antisense RNA 1                                          | antisense  | 103 | -1.08 | 3.35E-04 |
| TMPRSS4-AS1 | 453  | 100526771 | TMPRSS4 antisense RNA 1                                       | antisense  | 78  | 1.13  | 1.50E-04 |
| TTY6        | 590  | 84672     | testis-specific transcript, Y-linked 6 (non-protein coding)   | lincRNA    | 59  | 1.07  | 3.05E-03 |
| UBE2Q2P2    | 1862 | 100134869 | ubiquitin conjugating enzyme E2Q family member 2 pseudogene 2 | pseudogene | 564 | 1.03  | 1.24E-10 |
| USP32P3     | 1943 | 347716    | ubiquitin specific peptidase 32 pseudogene 3                  | pseudogene | 39  | 1.41  | 3.33E-04 |
| USP9YP18    | 695  | 106480424 | ubiquitin specific peptidase 9, Y-linked pseudogene 18        | pseudogene | 59  | 1.42  | 1.87E-05 |
| XPOTP1      | 2398 | 170559    | exportin, tRNA pseudogene 1                                   | pseudogene | 652 | 1.42  | 1.54E-19 |
| ZBED5-AS1   | 1995 | 729013    | ZBED5 antisense RNA 1                                         | antisense  | 133 | -1.52 | 3.26E-10 |
| ZNF674-AS1  | 2078 | 401588    | ZNF674 antisense RNA 1 (head to head)                         | lincRNA    | 231 | 1.21  | 7.90E-10 |

**Table S3. List of the best mature miRNAs significantly modulated by TGF- $\beta$  in lung fibroblasts following small RNA-seq analysis (Dataset 2).** The thresholds used for selection are: Base Mean >100 rpkm, Log<sub>2</sub> FC>0.5 and adj.Pval <0.05.

| Name              | description  | coord                     | TGF- $\beta$ regulation |
|-------------------|--------------|---------------------------|-------------------------|
| hsa-miR-10a-5p    | MIMAT0000253 | 17:46657266-46657288(-)   | Down                    |
| hsa-miR-10b-5p    | MIMAT0000254 | 2:177015057-177015079(+)  | Down                    |
| hsa-miR-127-5p    | MIMAT0004604 | 14:101349338-101349359(+) | Down                    |
| hsa-miR-145-3p    | MIMAT0004601 | 5:148810262-148810283(+)  | Up                      |
| hsa-miR-145-5p    | MIMAT0000437 | 5:148810224-148810246(+)  | Up                      |
| hsa-miR-146b-5p   | MIMAT0002809 | 10:104196277-104196298(+) | Down                    |
| hsa-miR-148a-3p   | MIMAT0000243 | 7:25989542-25989563(-)    | Up                      |
| hsa-miR-155-5p    | MIMAT0000646 | 21:26946295-26946317(+)   | Down                    |
| hsa-miR-181a-2-3p | MIMAT0004558 | 9:127454797-127454818(+)  | Up                      |
| hsa-miR-181a-3p   | MIMAT0000270 | 1:198828198-198828219(-)  | Up                      |
| hsa-miR-181b-5p   | MIMAT0000257 | 9:127456004-127456026(+)  | Up                      |
| hsa-miR-185-5p    | MIMAT0000455 | 22:20020676-20020697(+)   | Down                    |
| hsa-miR-197-3p    | MIMAT0000227 | 1:110141562-110141583(+)  | Down                    |
| hsa-miR-199a-3p   | MIMAT0000232 | 19:10928105-10928126(-)   | Up                      |
| hsa-miR-199a-5p   | MIMAT0000231 | 19:10928145-10928167(-)   | Up                      |
| hsa-miR-199b-3p   | MIMAT0004563 | 9:131007024-131007045(-)  | Up                      |
| hsa-miR-21-3p     | MIMAT0004494 | 17:57918672-57918692(+)   | Up                      |
| hsa-miR-218-5p    | MIMAT0000275 | 5:168195216-168195236(-)  | Down                    |
| hsa-miR-221-5p    | MIMAT0004568 | X:45605649-45605670(-)    | Down                    |
| hsa-miR-224-5p    | MIMAT0000281 | X:151127103-151127123(-)  | Down                    |
| hsa-miR-23a-3p    | MIMAT0000078 | 19:13947409-13947429(-)   | Up                      |
| hsa-miR-23b-3p    | MIMAT0000418 | 9:97847547-97847567(+)    | Up                      |
| hsa-miR-27a-3p    | MIMAT0000084 | 19:13947261-13947281(-)   | Up                      |
| hsa-miR-27a-5p    | MIMAT0004501 | 19:13947301-13947322(-)   | Up                      |
| hsa-miR-27b-3p    | MIMAT0000419 | 9:97847787-97847807(+)    | Up                      |
| hsa-miR-27b-5p    | MIMAT0004588 | 9:97847745-97847766(+)    | Up                      |
| hsa-miR-28-3p     | MIMAT0004502 | 3:188406622-188406643(+)  | Down                    |
| hsa-miR-30a-5p    | MIMAT0000087 | 6:72113298-72113319(-)    | Down                    |
| hsa-miR-30c-5p    | MIMAT0000244 | 6:72086706-72086728(-)    | Down                    |
| hsa-miR-30d-5p    | MIMAT0000245 | 8:135817162-135817183(-)  | Down                    |
| hsa-miR-30e-5p    | MIMAT0000692 | 1:41220043-41220064(+)    | Down                    |
| hsa-miR-330-3p    | MIMAT0000751 | 19:46142267-46142289(-)   | Down                    |
| hsa-miR-335-3p    | MIMAT0004703 | 7:130136003-130136024(+)  | Up                      |
| hsa-miR-335-5p    | MIMAT0000765 | 7:130135967-130135989(+)  | Up                      |
| hsa-miR-345-5p    | MIMAT0000772 | 14:100774213-100774234(+) | Down                    |
| hsa-miR-34c-5p    | MIMAT0000686 | 11:111384176-111384198(+) | Down                    |
| hsa-miR-409-3p    | MIMAT0001639 | 14:101531683-101531704(+) | Down                    |
| hsa-miR-424-3p    | MIMAT0004749 | X:133680674-133680694(-)  | Up                      |
| hsa-miR-424-5p    | MIMAT0001341 | X:133680710-133680731(-)  | Up                      |
| hsa-miR-450a-5p   | MIMAT0001545 | X:133674594-133674615(-)  | Down                    |
| hsa-miR-450b-5p   | MIMAT0004909 | X:133674261-133674282(-)  | Down                    |
| hsa-miR-455-3p    | MIMAT0004784 | 9:116971767-116971787(+)  | Up                      |
| hsa-miR-490-3p    | MIMAT0002806 | 7:136587989-136588010(+)  | Down                    |
| hsa-miR-539-3p    | MIMAT0022705 | 14:101513706-101513727(+) | Up                      |
| hsa-miR-629-5p    | MIMAT0004810 | 15:70371766-70371786(-)   | Down                    |
| hsa-miR-769-5p    | MIMAT0003886 | 19:46522219-46522240(+)   | Down                    |

**Table S4. List of themes corresponding to “canonical pathways” annotations associated with TGF- $\beta$  stimulation of MRC5 lung fibroblasts in presence of a control or DNM3OS-specific gapmer identified by Ingenuity Pathway Analysis.** MRC5 cells were stimulated with TGF- $\beta$  in presence of a control or a DNM3OS-specific gapmer. ( $n=3$ ). Expression profiles were determined with Agilent whole genome microarrays (Dataset 3). Z-scores calculated for each pathway (TGF- $\beta$  versus control) in the presence of a control or a DNM3OS-specific gapmer (Gp) are indicated. Significant pathways are shown in progressively brighter shades of blue (repression) and orange (activation) according to their significance.

| Canonical Pathway                         | Gp Control | Gp DNM3OS |
|-------------------------------------------|------------|-----------|
| Actin Cytoskeleton Signaling              | 3.92       | 3.57      |
| cAMP-mediated Signaling                   | -3.00      | -3.27     |
| Protein Kinase A Signaling                | -2.53      | -3.16     |
| RhoGDI Signaling                          | -3.27      | -1.22     |
| Interferon Signaling                      | -2.12      | -1.67     |
| Signaling by Rho Family GTPase            | 3.18       | 1.86      |
| VEGF Signaling                            | 1.51       | 2.84      |
| Intergrin Signaling                       | 2.56       | 2.72      |
| Rac Signaling                             | 2.11       | 2.40      |
| RhoA Signaling                            | 2.45       | 2.13      |
| Paxillin Signaling                        | 2.33       | 2.32      |
| Regulation of Actin-Based Motility by Rho | 1.70       | 1.09      |
| PAK Signaling                             | 1.60       | 1.15      |
| ILK Signaling                             | 1.30       | 2.20      |
| IL-6 Signaling                            | 1.50       | 2.06      |
| IGF-1 Signaling                           | 1.51       | 1.94      |
| PTEN Signaling                            | 0.83       | 0.47      |
| Wnt/Ca+ Pathway                           | 1.26       | 0.30      |
| Thrombin Signaling                        | 1.00       | 0.73      |
| PDGF Signaling                            | 1.21       | 0.94      |
| Death Receptor Signaling                  | -0.33      | -1.29     |
| Chemokine Signaling                       | 0.00       | -1.21     |
| Inflammasome Pathway                      | -1.34      | 0.00      |
| NRF2-mediated Oxidative Stress Response   | -1.50      | 1.07      |

**Table S5. List of themes corresponding to “canonical pathways” annotations identified by Ingenuity Pathway Analysis in response to overexpression of miR-199a-3p, miR-199a-5p or miR-214-3p in human MRC5 pulmonary fibroblasts MRC5.** MRC5 cells were transfected with pre-miR-Control, pre-miR-199a-3p, pre-miR-199a-5p or pre-miR-214-3p ( $n=3$ ). Expression profiles were determined with Agilent whole genome microarrays (Dataset 4). The probability to obtain the number of genes in a certain pathway in the list of differentially expressed genes between the different conditions was compared with the representation of the same pathway among all the genes on the microarray;  $-\log_{10}$  of the Fisher exact probability is indicated. Significant pathways are shown in progressively brighter shades of orange according to their significance.

| Canonical Pathway                                           | miR-199a-3p | miR-199a-5p | miR-214-3p |
|-------------------------------------------------------------|-------------|-------------|------------|
| PI3K/AKT signaling                                          | 4.05        | 3.60        | 1.20       |
| Cell Cycle: G2/M DNA Damage Checkpoint Regulation           | 0.88        | 5.29        | 2.48       |
| Superpathway of Cholesterol Biosynthesis                    | 0.28        | 8.07        | 0.00       |
| Ephrin B Signaling                                          | 1.94        | 1.92        | 3.81       |
| FGF Signaling                                               | 2.06        | 1.85        | 3.58       |
| Regulation of the Epithelial-Mesenchymal Transition pathway | 0.66        | 2.16        | 4.57       |
| HGF Signaling                                               | 3.10        | 2.44        | 1.75       |
| ERK/MAPK Signaling                                          | 3.16        | 1.63        | 2.16       |
| HIPPO Signaling                                             | 3.43        | 1.13        | 2.11       |
| Signaling by Rho Family GTPases                             | 2.7         | 2.02        | 1.93       |
| Protein Kinase A Signaling                                  | 2.53        | 2.87        | 1.14       |
| Cyclins and Cell Cycle Regulation                           | 1.29        | 3.97        | 1.02       |
| Adipogenesis Pathway                                        | 1.23        | 2.33        | 2.52       |
| AMPK Signaling                                              | 1.99        | 1.82        | 2.01       |
| PTEN Signaling                                              | 2.43        | 2.78        | 0.46       |
| Telomerase Signaling                                        | 1.17        | 2.57        | 1.84       |
| RAN Signaling                                               | 2.13        | 2.41        | 0.87       |
| STAT3 Signaling                                             | 1.39        | 1.92        | 2.04       |
| Cell Cycle Control of Chromosomal Replication               | 1.13        | 3.01        | 1.18       |
| Phospholipase C Signaling                                   | 2.05        | 2.90        | 0.31       |
| Pyridoxal 5'-phosphate Salvage Pathway                      | 1.08        | 0.87        | 2.99       |
| Glucocorticoid Receptor Signaling                           | 1.15        | 3.23        | 0.31       |
| RhoGDI Signaling                                            | 2.74        | 0.92        | 1.04       |
| Mitotic Roles of Polo-Like Kinase                           | 0.62        | 3.35        | 0.56       |
| SAPK/JNK Signaling                                          | 1.28        | 2.33        | 0.89       |
| ErbB2-ErbB3 Signaling                                       | 0.58        | 1.14        | 2.75       |
| Wnt/ $\beta$ -catenin Signaling                             | 0.83        | 1.54        | 2.06       |

**Table S6. LNA-modified oligonucleotides used for *in vivo* experiments**

| Name                         | Sequence               |
|------------------------------|------------------------|
| LNA-negative Control         | 5'-TCAGTATTAGCAGCT-3'  |
| LNA-miR-199a-5p              | 5'-TAGTCTGAACACTGG-3'  |
| CAV1 Target Site blocker N°1 | 5'-TGTGACCGTACCGGTG-3' |
| CAV1 Target Site Blocker N°2 | 5'-GTCTGTGACCGTAC-3'   |

**Table S7. Characteristics of 3'UTR psiCHECK-2 plasmid constructions**

| Construction                  | RefSeq    | Position on human 3'UTR |
|-------------------------------|-----------|-------------------------|
| <b>GSK3<math>\beta</math></b> | NM_002093 | 1072 - 1503             |
| <b>PTGS2</b>                  | NM_000963 | 1565 - 2527             |
| <b>FGF7</b>                   | NM_002009 | 1 -245                  |

**Table S8. TaqMan assays used for miRNAs expression analysis**

| Assay name  | Assay ID |
|-------------|----------|
| miR-199a-5p | 000498   |
| miR-199a-3p | 002304   |
| miR-214-3p  | 002306   |
| RNU44       | 0010921  |
| SNO251      | 001236   |

**Table S9. qPCR primers used for gene expression analysis**

| Gene name              | Human Primers                                         | Mouse Primers                                       |
|------------------------|-------------------------------------------------------|-----------------------------------------------------|
| PPIA                   | F: GACCCAACACAAATGGTTCC<br>R: GGCCTCCACAATATTCATGC    | F: GACCAAACACAAACGGTTCC<br>R: TTCACCTTCCCAAAGACCAC  |
| COL1A1                 | F: TTCTGCAACATGGAGACTGG<br>R: AATCCATCGGTCATGCTCTC    | F: GGCAAGAATGGAGATGATGG<br>R: ACCATCCAAACCACTGAAGC  |
| FN1                    | F: ATGAGCTGCACATGTCTTGG<br>R: TGGCACCGAGATATTCCTTC    | F: TGAGGAACATGGCTTTAGGC<br>R: ATTCGGCAGGTATGGTCTTG  |
| ACTA2 ( $\alpha$ -SMA) | F: ACTGGGACGACATGGAAAAG<br>R: GAGTCATTTTCTCCCGGTTG    | F: TTGCTGACAGGATGCAGAAG<br>R: TGATCCACATCTGCTGGAAG  |
| DNM3OS                 | F: AGCATCCATGCTCGGTAAAG<br>R: TTGTGATGGGTGGGCTATTC    | F: TGAGAATGGCTGCTGTTACC<br>R: TTCACAAGACCTCTGCATCTC |
| PTGS2 (COX2)           | F: GAATCATTACCAGGCCAAATTG<br>R: CTTTCTGTACTGCGGGTGGAA |                                                     |
| CAV1                   | F: TTTCCCTGCCTCTCATCAAC<br>R: CCGGTGATGGATTAGTTTGG    | F: TTGTACCGTGCATCAAGAGC<br>R: AAAGAGTGGATCGCAGAAGG  |
